# Supplementary material for: VHL suppresses UBE3B-mediated breast tumor growth and metastasis
Source: PubMed Central journal article supplement (PMC11196597; doi:10.1038/s41419-024-06844-x), 2024-06-24
Supplement: 41419_2024_6844_MOESM1_ESM.pdf [file 41419_2024_6844_MOESM1_ESM.pdf]

## **Supplemental Figures and Table**

### **VHL suppresses UBE3B-mediated breast tumor growth and metastasis**

Shuo Wang<sup>1</sup>, Huiyan Li<sup>1</sup>, Xiong Liu<sup>2</sup>, Tingting Yin<sup>1</sup>, Tingru Li<sup>1</sup>, Miaomiao Zheng<sup>1</sup>, Min Liu<sup>1</sup>,  
Xiaoqian Meng<sup>1</sup>, Jun Zhou<sup>1</sup>, Yijie Wang<sup>1,\*</sup>, and Yan Chen<sup>1,2,\*</sup>

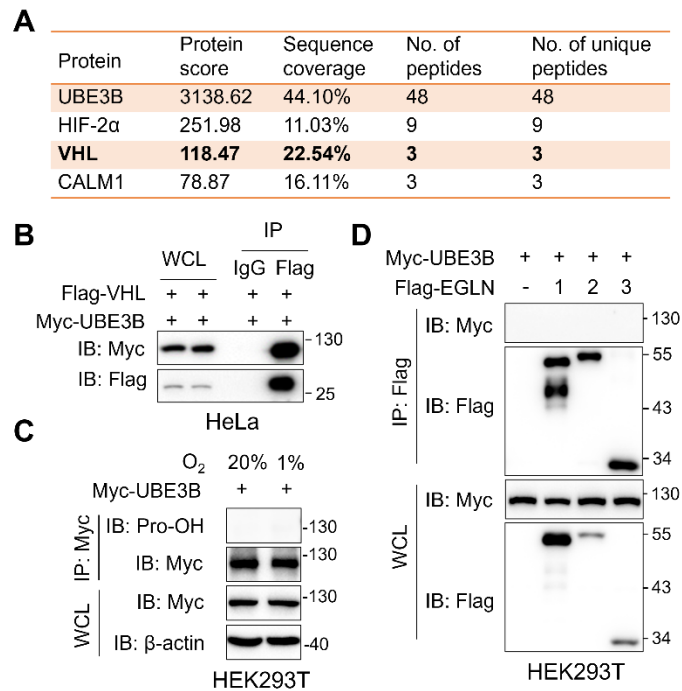

**Fig. S1 UBE3B interacts with VHL independent of EGLNs.** **A** Representatives of potential UBE3B-interacting proteins. **B** HeLa cells transfected with vectors expressing Flag-VHL and Myc-UBE3B were subjected to Co-IP assays using IgG or anti-Flag antibody. **C** MDA-MB-231 cells expressing Myc-UBE3B were cultured under normoxia or hypoxia for 24 hours, then the hydroxylation of immunoprecipitated Myc-UBE3B was detected with anti-hydroxyproline antibody. **D** Co-IP of exogenous Myc-UBE3B with Flag-EGLN1, Flag-EGLN2, or Flag-EGLN3 in HEK293T cells. WCL, whole cell lysate.

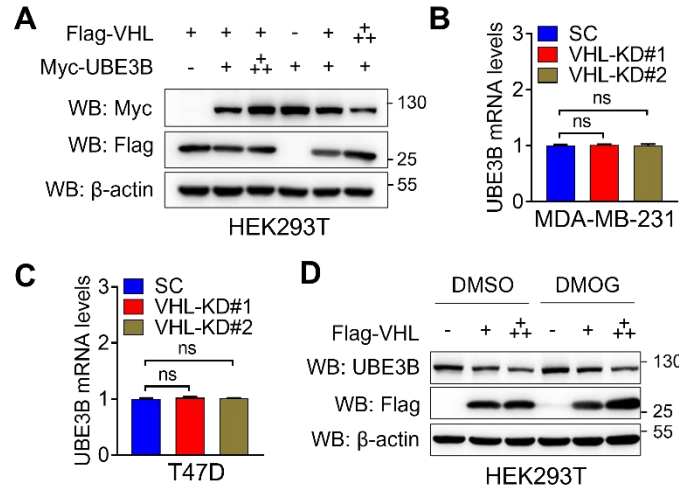

**Fig. S2 UBE3B knockdown suppresses the oncogenic properties of breast cancer cells.** **A** The impact of Myc-UBE3B on Flag-VHL stability and vice versa. **B**, **C** UBE3B's mRNA levels in scrambled shRNA (SC) and VHL knockdown (KD) MDA-MB-231 cells (B) or T47D cells (C) were determined by RT-qPCR. **D** The protein levels of endogenous UBE3B were analyzed in Flag-VHL-expressing MDA-MB-231 cells treated with either DMSO or 1 mM DMOG.

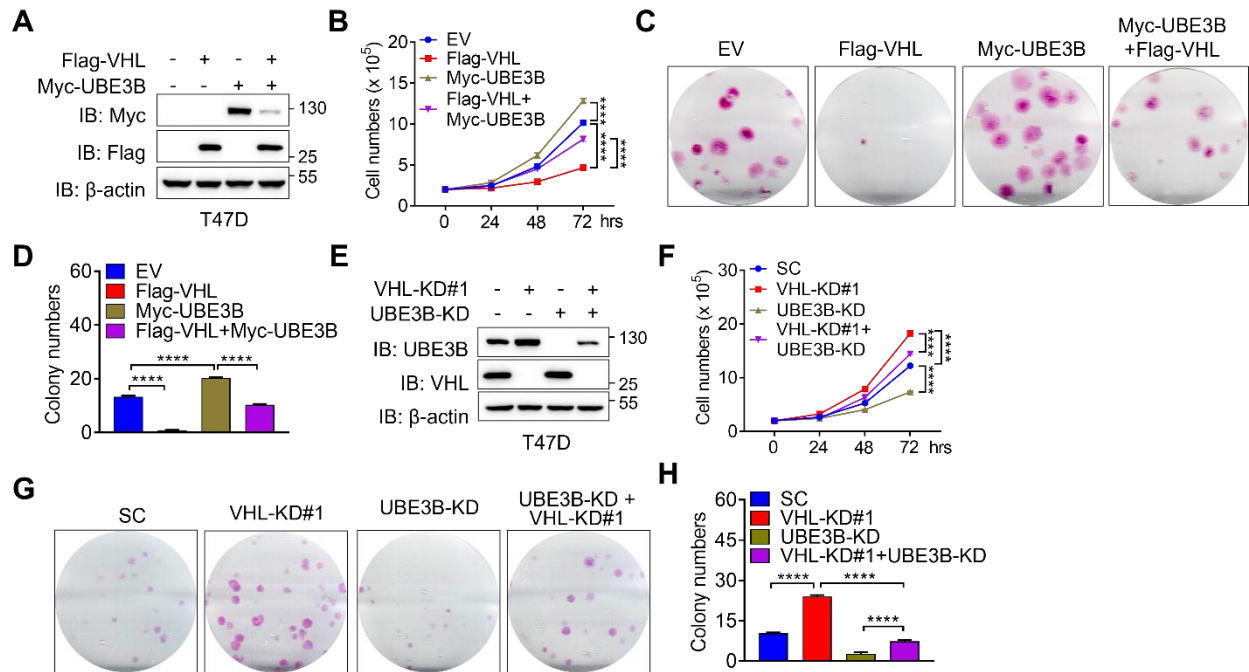

**Fig. S3 VHL inhibits the oncogenic potential of breast cancer cells by suppressing UBE3B. A**

Protein levels of Flag-VHL and Myc-UBE3B in T47D cells stably expressing Flag-VHL or Myc-

UBE3B. **B** The cell proliferation rate was measured in the indicated T47D cells (mean  $\pm$  SD, n=3).

\*\*\*\*P<0.0001, by 2-way ANOVA Tukey's multiple comparisons test. hrs, hours. **C, D** Colony

formation of the indicated T47D cells, with representative images from three experiments were

shown in (C). Colony numbers (D) were quantified (mean  $\pm$  SD, n=3). \*\*\*\*P<0.0001, by 1-way

ANOVA Tukey's multiple comparisons test. **E** Protein levels of VHL and UBE3B were detected

in control, VHL-KD#1, UBE3B-KD, and VHL- and UBE3B-double knockdown (VHL-KD#1 +

UBE3B-KD) T47D cells. **F** Proliferation rate of SC, VHL-KD#1, UBE3B-KD, and VHL-KD#1 +

UBE3B-KD T47D cells (mean  $\pm$  SD, n=3). \*\*\*\*P<0.0001, by 2-way ANOVA Tukey's multiple

comparisons test. hrs, hours. **G, H** Colony formation were performed in control, VHL-KD#1,

UBE3B-KD, and VHL-KD#1 + UBE3B-KD MDA-MB-231 cells, and the representative images

from three experiments were shown (G). Colony numbers (H) were quantified (mean  $\pm$  SD, n=3).

\*\*\*\*P<0.0001, by 1-way ANOVA Tukey's multiple comparisons test.

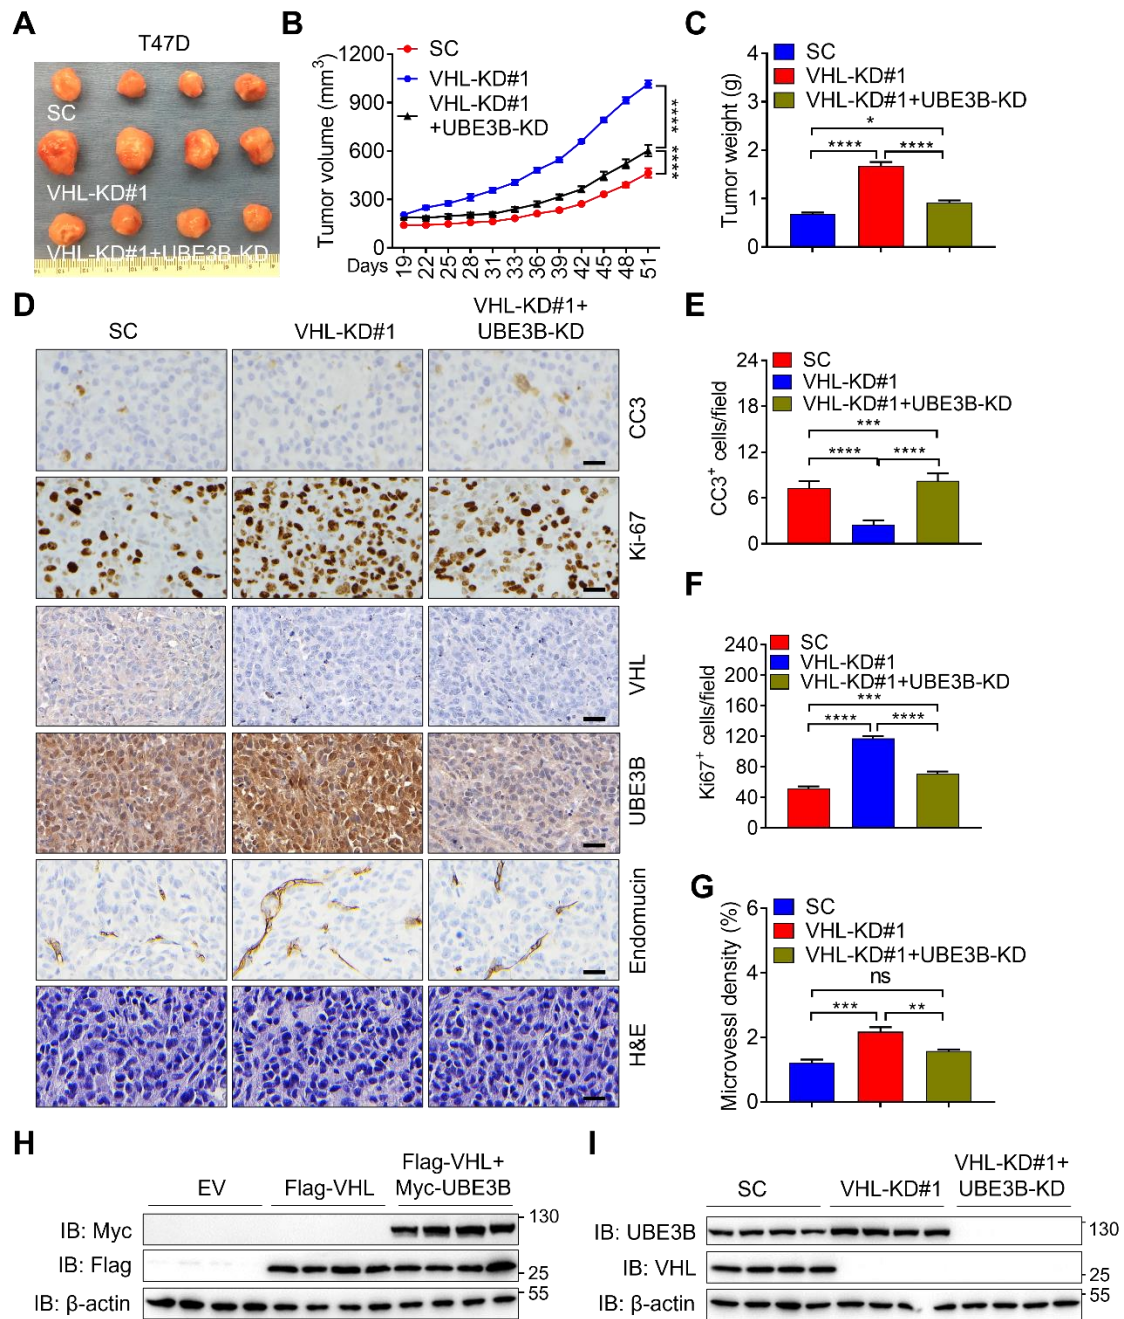

**Fig. S4 VHL functions via UBE3B in regulation of breast tumor growth and metastasis. A-C**

Tumor images (A), tumor growth curves (B) and tumor weight (C) of mice with orthotopic implantation of SC, VHL-KD#1, and VHL-KD#1 +UBE3B-KD T47D cells into the mammary fat pad (mean  $\pm$  SD, n=4). \*\*\*\*P<0.0001, by 2-way ANOVA Tukey's multiple comparisons test (B) or 1-way ANOVA Tukey's multiple comparisons test (C). **D-G** Representative H&E and immunohistochemical staining of Ki-67, CC3 (cleaved caspase 3), and Endomucin in primary

tumors (D). Scale bars: 100  $\mu\text{m}$ . Ki-67-positive cell numbers (E), CC3-positive cell numbers (F), and microvessel density (G) were quantified. (mean  $\pm$  SD, n=4). \*\*\*P<0.001, \*\*\*\*P<0.0001, by 1-way ANOVA Dunnett's multiple comparisons test. **H, I** Protein levels of UBE3B and VHL in MDA-MB-231 tumors (H) and T47D tumors (I).

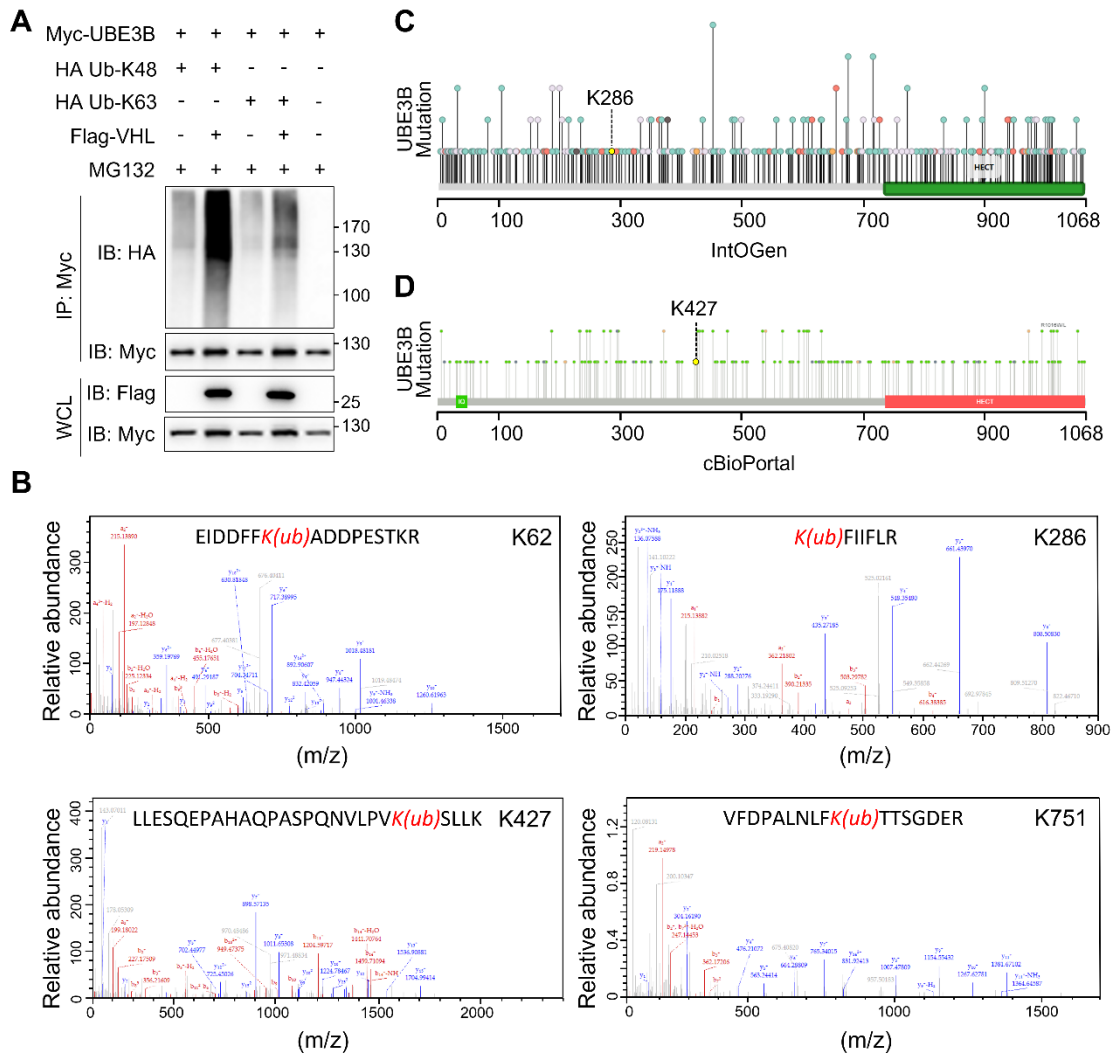

**Fig. S5 Lysine residues 286 and 427 of UBE3B are key ubiquitination sites by VHL. A** Ubiquitination of Myc-UBE3B in HEK293T cells with or without Flag-VHL. **B** The mass spectra of ubiquitinated UBE3B peptides. **C, D** Mutations of K286 and K427 have been identified in different tumors by analyzing datasets from Integrative Onco Genomics (IntOGen) and cBio Cancer Genomics Portal (cBioPortal).

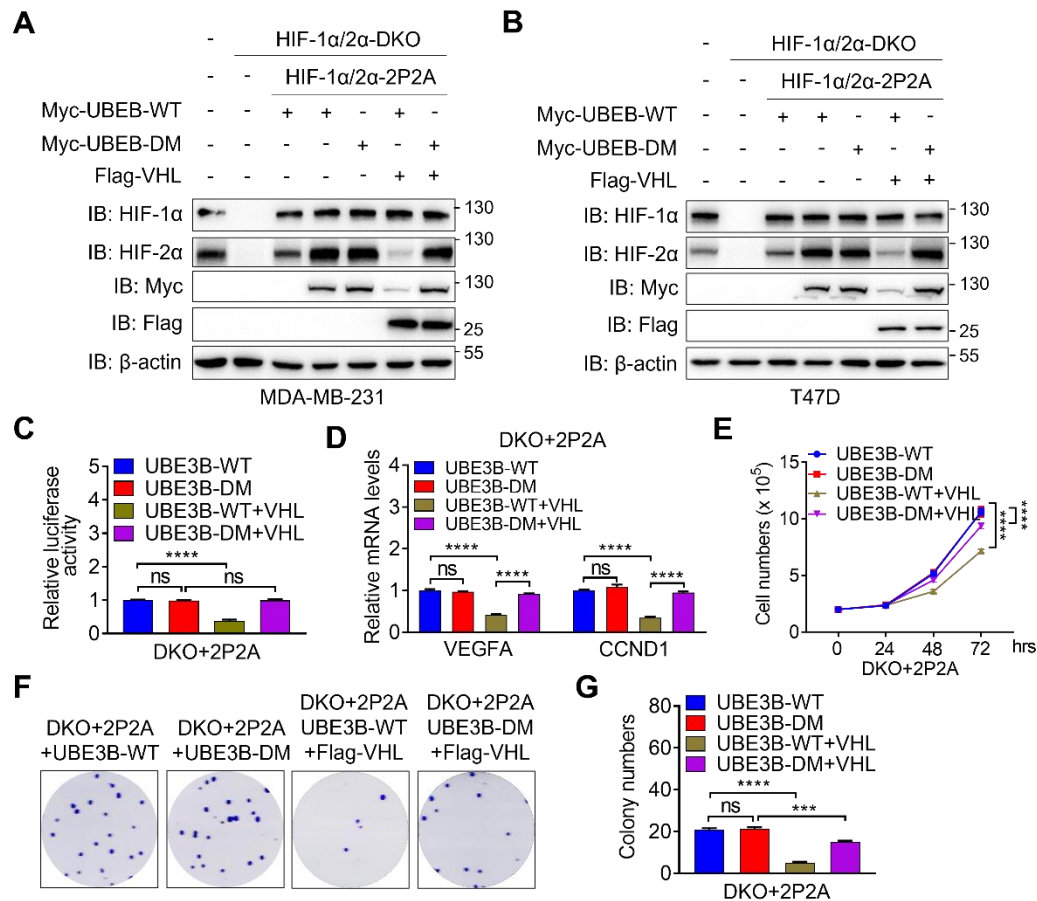

**Fig. S6 VHL suppresses the oncogenic potential of breast cancer cells by ubiquitinating UBE3B at lysine residues 286 and 427.** **A, B** Protein levels of HIF-1 $\alpha$ , HIF-2 $\alpha$ , Myc-UBE3B and Flag-VHL in control, HIF-1 $\alpha$ /HIF-2 $\alpha$  double knockout (DKO), DKO + HIF-1 $\alpha$ /HIF-2 $\alpha$ -2P2A (HIF-1 $\alpha$ -P402/564A [HIF-1 $\alpha$ -P2A] and HIF-2 $\alpha$ -P405/531A [HIF-2 $\alpha$ -P2A]), DKO + 2P2A + Myc-UBE3B-WT, DKO + 2P2A + Myc-UBE3B-K286/427R (DM), DKO + 2P2A + Myc-UBE3B-WT + Flag-VHL, and DKO + 2P2A + Myc-UBE3B-DM + Flag-VHL MDA-MB-231(A) and T47D (B) cells. **C, D** Luciferase activity (C) and mRNA levels of VEGFA and CCND1 (D) were measured in DKO + 2P2A + Myc-UBE3B-WT, DKO + 2P2A + Myc-UBE3B-DM, DKO + 2P2A + Myc-UBE3B-WT + Flag-VHL, and DKO + 2P2A + Myc-UBE3B-DM + Flag-VHL T47D cells (mean  $\pm$  SD, n=3). \*\*\*\*P<0.0001, by 1-way ANOVA Tukey's multiple comparisons test. **E-G** Proliferation (E) and colony formation (F, G) were performed using DKO + 2P2A + Myc-UBE3B-WT, DKO + 2P2A + Myc-UBE3B-DM, DKO + 2P2A + Myc-UBE3B-WT + Flag-VHL, and DKO



+ 2P2A + Myc-UBE3B-DM + Flag-VHL T47D cells (mean  $\pm$  SD, n=3). \*\*\*\*P<0.0001, by 2-way ANOVA Tukey's multiple comparisons test (D, E) or 1-way ANOVA Tukey's multiple comparisons test (C, G). ns, no significance.

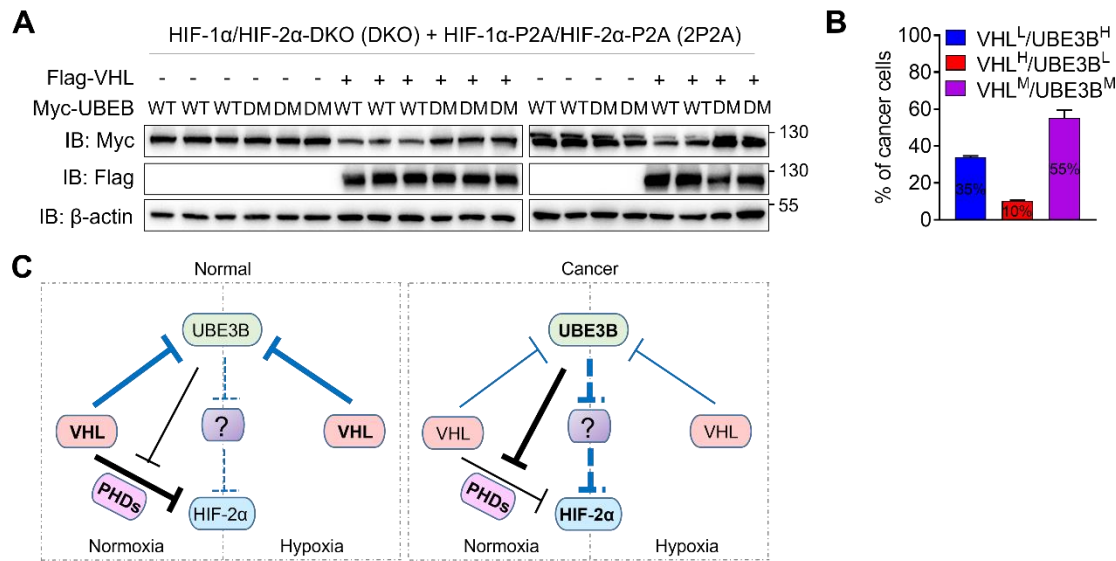

**Fig. S7 VHL suppresses breast tumor growth and metastasis through ubiquitinating UBE3B at lysine residues 286 and 427.** **A** Myc-UBE3B and Flag-VHL protein levels in T47D breast tumor tissues, as described in Fig. 7A. **B** Percentage of cancer cells that displayed a negative correlation between the protein levels of UBE3B and VHL. H, high; L, low; M, medium. **C** Schematic model illustrating the regulatory network among VHL, UBE3B, and HIF-2 $\alpha$  in breast cancer cells. VHL physically interacts with UBE3B and HIF-2 $\alpha$ , promoting their proteasomal degradation. Conversely, UBE3B counteracts the degradation of HIF-2 $\alpha$  by VHL and other unknown E3 ligase(s) (indicated by question mark) in both hypoxia and normoxia. In normal breast cells, elevated VHL protein levels keep UBE3B and HIF-2 $\alpha$  at lower levels, maintaining basic cellular functions; In breast cancer cells, reduced VHL protein levels lead to the attenuation of both VHL- and other unknown E3 ligase(s)-mediated HIF-2 $\alpha$  degradation. Notably, VHL-mediated UBE3B degradation and UBE3B's activity remain unaffected by oxygen levels.

**Table S1 Identification of UBE3B-interating proteins by LC-MS/MS analysis**

| Accession | Protein names                               | Gene names | MW [kDa] | Protein score | Sequence coverage (%) | # Unique Peptides | # Peptides | # PSMs |
|-----------|---------------------------------------------|------------|----------|---------------|-----------------------|-------------------|------------|--------|
| P35579    | Myosin-9                                    | MYH9       | 226.39   | 5356.58       | 53.37                 | 83                | 99         | 172    |
| Q7Z3V4    | Ubiquitin-protein ligase E3B                | UBE3B      | 123.02   | 3138.62       | 44.10                 | 48                | 48         | 128    |
| P35580    | Myosin-10                                   | MYH10      | 228.86   | 3042.51       | 45.65                 | 65                | 78         | 105    |
| Q9UM54    | Unconventional myosin-VI                    | MYO6       | 149.60   | 1129.55       | 26.20                 | 29                | 29         | 40     |
| P09874    | Poly [ADP-ribose] polymerase 1              | PARP1      | 113.01   | 1041.67       | 31.56                 | 31                | 31         | 42     |
| P63261    | Actin, cytoplasmic 2                        | ACTG1      | 41.77    | 1029.96       | 66.67                 | 10                | 18         | 36     |
| P04264    | Keratin, type II cytoskeletal 1             | KRT1       | 66.00    | 950.81        | 43.01                 | 18                | 22         | 28     |
| P52272    | Heterogeneous nuclear ribonucleoprotein M   | HNRNPM     | 77.46    | 941.54        | 36.85                 | 22                | 22         | 31     |
| Q7Z406    | Myosin-14                                   | MYH14      | 227.73   | 929.68        | 17.29                 | 20                | 29         | 35     |
| P35527    | Keratin, type I cytoskeletal 9              | KRT9       | 62.03    | 880.23        | 41.41                 | 17                | 17         | 23     |
| Q16891    | MICOS complex subunit MIC60                 | IMMT       | 83.63    | 837.04        | 38.39                 | 24                | 24         | 32     |
| Q9UQ35    | Serine/arginine repetitive matrix protein 2 | SRRM2      | 299.44   | 725.63        | 12.75                 | 23                | 23         | 27     |
| P06748    | Nucleophosmin                               | NPM1       | 32.56    | 720.23        | 30.61                 | 7                 | 7          | 15     |
| O14950    | Myosin regulatory light chain 12B           | MYL12B     | 19.77    | 658.74        | 50.58                 | 8                 | 8          | 19     |
| P13645    | Keratin, type I cytoskeletal 10             | KRT10      | 58.79    | 641.60        | 32.71                 | 16                | 18         | 19     |
| P39023    | 60S ribosomal protein L3                    | RPL3       | 46.08    | 620.25        | 36.23                 | 14                | 14         | 23     |
| P61247    | 40S ribosomal protein S3a                   | RPS3A      | 29.93    | 606.00        | 44.70                 | 11                | 11         | 19     |
| P17844    | Probable ATP-dependent RNA helicase DDX5    | DDX5       | 69.11    | 602.66        | 33.55                 | 13                | 17         | 23     |
| Q9NYF8    | Bcl-2-associated transcription factor 1     | BCLAF1     | 106.06   | 583.35        | 22.17                 | 15                | 15         | 21     |
| P35908    | Keratin, type II cytoskeletal 2 epidermal   | KRT2       | 65.39    | 579.16        | 33.33                 | 14                | 19         | 22     |
| P11142    | Heat shock cognate 71 kDa protein           | HSPA8      | 70.85    | 561.53        | 23.37                 | 9                 | 11         | 15     |
| P19338    | Nucleolin                                   | NCL        | 76.568   | 530.4834      | 23.38028169           | 15                | 15         | 17     |
| P05387    | 60S acidic ribosomal protein P2             | RPLP2      | 11.66    | 526.77        | 85.22                 | 7                 | 7          | 11     |

|        |                                                                      |          |        |        |       |    |    |    |
|--------|----------------------------------------------------------------------|----------|--------|--------|-------|----|----|----|
| Q9BQG0 | Myb-binding protein 1A                                               | MYBBP1A  | 148.76 | 521.07 | 13.25 | 16 | 16 | 18 |
| Q9P2E9 | Ribosome-binding protein 1                                           | RRBP1    | 152.37 | 515.11 | 15.53 | 16 | 16 | 17 |
| Q02878 | 60S ribosomal protein L6                                             | RPL6     | 32.71  | 512.53 | 39.58 | 14 | 14 | 20 |
| Q92841 | Probable ATP-dependent RNA helicase DDX17                            | DDX17    | 80.22  | 505.59 | 27.16 | 13 | 17 | 20 |
| P05388 | 60S acidic ribosomal protein P0                                      | RPLP0    | 34.25  | 504.05 | 49.84 | 12 | 12 | 17 |
| P06899 | Histone H2B type 1-J                                                 | H2BC11   | 13.90  | 494.63 | 41.27 | 2  | 6  | 15 |
| Q9NR30 | Nucleolar RNA helicase 2                                             | DDX21    | 87.29  | 492.34 | 25.16 | 16 | 17 | 22 |
| O60814 | Histone H2B type 1-K                                                 | H2BC12   | 13.88  | 483.61 | 41.27 | 1  | 5  | 14 |
| P09651 | Heterogeneous nuclear ribonucleoprotein A1                           | HNRNPA1  | 38.72  | 474.39 | 31.99 | 7  | 9  | 13 |
| P62805 | Histone H4                                                           | H4C1     | 11.36  | 468.32 | 47.57 | 6  | 6  | 15 |
| O94832 | Unconventional myosin-Id                                             | MYO1D    | 116.13 | 464.16 | 28.33 | 25 | 25 | 27 |
| P11940 | Polyadenylate-binding protein 1                                      | PABPC1   | 70.63  | 461.58 | 29.56 | 12 | 18 | 22 |
| P08238 | Heat shock protein HSP 90-beta                                       | HSP90AB1 | 83.21  | 453.47 | 28.59 | 9  | 17 | 20 |
| Q8IWS0 | PHD finger protein 6                                                 | PHF6     | 41.26  | 447.14 | 22.74 | 7  | 7  | 12 |
| Q9NZI8 | Insulin-like growth factor 2 mRNA-binding protein                    | IGF2BP1  | 63.44  | 442.98 | 22.70 | 9  | 10 | 11 |
| P68032 | Actin, alpha cardiac muscle 1                                        | ACTC1    | 41.99  | 441.68 | 26.26 | 1  | 9  | 22 |
| Q9Y2W1 | Thyroid hormone receptor-associated protein 3                        | THRAP3   | 108.60 | 440.70 | 23.87 | 20 | 20 | 22 |
| P23396 | 40S ribosomal protein S3                                             | RPS3     | 26.67  | 439.83 | 67.08 | 15 | 15 | 20 |
| O00571 | ATP-dependent RNA helicase DDX3X                                     | DDX3X    | 73.20  | 437.10 | 26.44 | 12 | 13 | 15 |
| P62263 | 40S ribosomal protein S14                                            | RPS14    | 16.26  | 437.07 | 36.42 | 5  | 5  | 10 |
| Q08J23 | RNA cytosine C(5)-methyltransferase NSUN2                            | NSUN2    | 86.42  | 418.13 | 22.16 | 14 | 14 | 18 |
| Q8IYB3 | Serine/arginine repetitive matrix protein 1                          | SRRM1    | 102.27 | 398.36 | 15.60 | 9  | 9  | 11 |
| Q9UKV3 | Protopoietin-1-induced chromatin condensation inducer in the nucleus | ACIN1    | 151.77 | 394.78 | 13.50 | 14 | 14 | 15 |
| Q08211 | ATP-dependent RNA helicase A                                         | DHX9     | 140.87 | 388.65 | 14.88 | 18 | 18 | 22 |
| P32969 | 60S ribosomal protein L9                                             | RPL9     | 21.85  | 385.68 | 53.65 | 8  | 8  | 13 |
| P08708 | 40S ribosomal protein S17                                            | RPS17    | 15.54  | 380.65 | 54.81 | 5  | 5  | 11 |
| Q9BVP2 | Guanine nucleotide-binding protein-like 3                            | GNL3     | 61.95  | 377.55 | 24.59 | 10 | 11 | 13 |

|        |                                                     |          |        |        |       |    |    |    |
|--------|-----------------------------------------------------|----------|--------|--------|-------|----|----|----|
| Q6PKG0 | La-related protein 1                                | LARP1    | 123.43 | 374.88 | 11.86 | 9  | 9  | 11 |
| P62753 | 40S ribosomal protein S6                            | RPS6     | 28.66  | 370.49 | 29.72 | 9  | 9  | 13 |
| O75643 | J5 small nuclear ribonucleoprotein 200 kDa helicase | SNRNP200 | 244.35 | 366.96 | 8.19  | 15 | 15 | 16 |
| P62701 | 40S ribosomal protein S4, X isoform                 | RPS4X    | 29.58  | 366.73 | 48.67 | 14 | 14 | 21 |
| O00159 | Unconventional myosin-Ic                            | MYO1C    | 121.61 | 358.14 | 21.17 | 18 | 18 | 19 |
| P62424 | 60S ribosomal protein L7a                           | RPL7A    | 29.98  | 333.35 | 41.35 | 13 | 13 | 15 |
| Q01130 | Serine/arginine-rich splicing factor 2              | SRSF2    | 25.46  | 323.69 | 33.48 | 5  | 7  | 10 |
| O75533 | Splicing factor 3B subunit 1                        | SF3B1    | 145.74 | 318.45 | 11.66 | 11 | 11 | 14 |
| Q9NVI7 | ATPase family AAA domain-containing protein 3A      | ATAD3A   | 71.33  | 317.48 | 23.50 | 4  | 13 | 13 |
| P68363 | Tubulin alpha-1B chain                              | TUBA1B   | 50.12  | 309.67 | 25.94 | 9  | 9  | 11 |
| P0DMV8 | Heat shock 70 kDa protein 1A                        | HSPA1A   | 70.01  | 309.34 | 22.15 | 9  | 10 | 11 |
| P04843 | phosphooligosaccharide--protein glycosyltransferase | RPN1     | 68.53  | 308.00 | 18.45 | 10 | 10 | 10 |
| P62888 | 60S ribosomal protein L30                           | RPL30    | 12.78  | 300.47 | 59.13 | 7  | 7  | 11 |
| Q6P2Q9 | Pre-mRNA-processing-splicing factor 8               | PRPF8    | 273.43 | 299.66 | 6.85  | 16 | 16 | 16 |
| P62829 | 60S ribosomal protein L23                           | RPL23    | 14.86  | 296.78 | 56.43 | 6  | 6  | 11 |
| Q86V81 | THO complex subunit 4                               | ALYREF   | 26.87  | 293.17 | 29.96 | 6  | 6  | 9  |
| P26373 | 60S ribosomal protein L13                           | RPL13    | 24.25  | 293.11 | 34.60 | 8  | 8  | 9  |
| P25398 | 40S ribosomal protein S12                           | RPS12    | 14.51  | 284.20 | 41.67 | 4  | 4  | 8  |
| P78527 | DNA-dependent protein kinase catalytic subunit      | PRKDC    | 468.79 | 283.77 | 2.64  | 10 | 10 | 11 |
| Q07020 | 60S ribosomal protein L18                           | RPL18    | 21.62  | 281.42 | 39.36 | 7  | 7  | 8  |
| P46781 | 40S ribosomal protein S9                            | RPS9     | 22.58  | 279.10 | 37.11 | 11 | 11 | 12 |
| Q9UJV9 | Probable ATP-dependent RNA helicase DDX41           | DDX41    | 69.79  | 278.72 | 20.42 | 10 | 10 | 11 |
| P60660 | Myosin light polypeptide 6                          | MYL6     | 16.92  | 278.67 | 54.30 | 5  | 7  | 11 |
| P62081 | 40S ribosomal protein S7                            | RPS7     | 22.11  | 278.56 | 51.55 | 7  | 7  | 11 |
| P38159 | RNA-binding motif protein, X chromosome             | RBMX     | 42.31  | 275.98 | 31.46 | 12 | 12 | 12 |
| P30050 | 60S ribosomal protein L12                           | RPL12    | 17.81  | 274.51 | 42.42 | 6  | 6  | 8  |
| P46777 | 60S ribosomal protein L5                            | RPL5     | 34.34  | 273.09 | 20.88 | 7  | 7  | 13 |

|        |                                                           |           |        |        |       |    |    |    |
|--------|-----------------------------------------------------------|-----------|--------|--------|-------|----|----|----|
| P10809 | 60 kDa heat shock protein, mitochondrial                  | HSPD1     | 61.02  | 270.64 | 16.06 | 7  | 7  | 8  |
| P62269 | 40S ribosomal protein S18                                 | RPS18     | 17.71  | 270.42 | 47.37 | 9  | 9  | 10 |
| Q7L2E3 | ATP-dependent RNA helicase DHX30                          | DHX30     | 133.86 | 269.98 | 10.13 | 11 | 11 | 12 |
| O43143 | RNA-splicing factor ATP-dependent RNA helicase 1          | DHX15     | 90.88  | 269.57 | 11.32 | 8  | 8  | 11 |
| P22626 | Heterogeneous nuclear ribonucleoproteins A2/B1            | HNRNPA2B1 | 37.41  | 267.76 | 25.50 | 7  | 9  | 13 |
| Q00839 | Heterogeneous nuclear ribonucleoprotein U                 | HNRNPU    | 90.53  | 263.73 | 16.12 | 10 | 10 | 13 |
| P26368 | Splicing factor U2AF 65 kDa subunit                       | U2AF2     | 53.47  | 262.49 | 19.58 | 5  | 5  | 10 |
| Q9UHX1 | Poly(U)-binding-splicing factor PUF60                     | PUF60     | 59.84  | 261.39 | 19.32 | 6  | 6  | 10 |
| P07900 | Heat shock protein HSP 90-alpha                           | HSP90AA1  | 84.61  | 261.03 | 15.16 | 2  | 10 | 12 |
| P06396 | Gelsolin                                                  | GSN       | 85.64  | 259.32 | 11.00 | 7  | 7  | 7  |
| P62244 | 40S ribosomal protein S15a                                | RPS15A    | 14.83  | 257.95 | 51.54 | 6  | 6  | 8  |
| P18621 | 60S ribosomal protein L17                                 | RPL17     | 21.38  | 253.91 | 35.33 | 7  | 7  | 12 |
| P67809 | Y-box-binding protein 1                                   | YBX1      | 35.90  | 253.49 | 28.70 | 5  | 6  | 7  |
| Q14498 | RNA-binding protein 39                                    | RBM39     | 59.34  | 252.52 | 23.02 | 9  | 9  | 10 |
| Q9BZE4 | Nucleolar GTP-binding protein 1                           | GTPBP4    | 73.92  | 252.26 | 20.35 | 11 | 11 | 11 |
| Q99814 | Endothelial PAS domain-containing protein 1               | EPAS1     | 96.40  | 251.98 | 11.03 | 9  | 9  | 10 |
| P61513 | 60S ribosomal protein L37a                                | RPL37A    | 10.27  | 250.98 | 45.65 | 5  | 5  | 10 |
| Q96HS1 | Serine/threonine-protein phosphatase PGAM5, mitochondrion | PGAM5     | 31.99  | 249.32 | 38.06 | 12 | 12 | 13 |
| O14654 | Insulin receptor substrate 4                              | IRS4      | 133.69 | 248.75 | 11.06 | 11 | 11 | 13 |
| Q07955 | Serine/arginine-rich splicing factor 1                    | SRSF1     | 27.73  | 245.85 | 39.52 | 10 | 10 | 12 |
| Q6P5R6 | 60S ribosomal protein L22-like 1                          | RPL22L1   | 14.60  | 244.85 | 25.41 | 3  | 3  | 5  |
| Q9UN86 | Ras GTPase-activating protein-binding protein 2           | G3BP2     | 54.09  | 244.68 | 22.82 | 6  | 7  | 11 |
| P15880 | 40S ribosomal protein S2                                  | RPS2      | 31.31  | 242.59 | 38.91 | 11 | 11 | 12 |
| Q14974 | Importin subunit beta-1                                   | KPNB1     | 97.11  | 235.28 | 13.13 | 8  | 8  | 9  |
| O00567 | Nucleolar protein 56                                      | NOP56     | 66.01  | 231.18 | 16.33 | 6  | 6  | 9  |
| Q08170 | Serine/arginine-rich splicing factor 4                    | SRSF4     | 56.65  | 229.28 | 12.15 | 3  | 6  | 6  |
| P51116 | fragile X mental retardation syndrome-related protein 2   | FXR2      | 74.18  | 228.96 | 10.70 | 4  | 5  | 6  |

|        |                                                     |         |        |        |       |    |    |    |
|--------|-----------------------------------------------------|---------|--------|--------|-------|----|----|----|
| P51991 | Heterogeneous nuclear ribonucleoprotein A3          | HNRNPA3 | 39.57  | 227.86 | 15.08 | 4  | 5  | 7  |
| P83731 | 60S ribosomal protein L24                           | RPL24   | 17.77  | 224.64 | 36.31 | 6  | 6  | 8  |
| Q9H0A0 | RNA cytidine acetyltransferase                      | NAT10   | 115.66 | 224.53 | 11.12 | 8  | 9  | 9  |
| P36578 | 60S ribosomal protein L4                            | RPL4    | 47.67  | 224.46 | 25.29 | 9  | 9  | 9  |
| Q9BYG3 | I67 FHA domain-interacting nucleolar phosphoprotein | NIFK    | 34.20  | 223.98 | 24.91 | 5  | 5  | 6  |
| P51114 | agile X mental retardation syndrome-related protein | FXR1    | 69.68  | 222.78 | 11.11 | 5  | 6  | 7  |
| P63173 | 60S ribosomal protein L38                           | RPL38   | 8.21   | 221.99 | 32.86 | 5  | 5  | 7  |
| O76021 | Ribosomal L1 domain-containing protein 1            | RSL1D1  | 54.94  | 221.88 | 14.08 | 5  | 5  | 6  |
| Q9Y4I1 | Unconventional myosin-Va                            | MYO5A   | 215.27 | 218.79 | 5.98  | 10 | 10 | 11 |
| Q13283 | Ras GTPase-activating protein-binding protein 1     | G3BP1   | 52.13  | 218.78 | 20.17 | 6  | 7  | 11 |
| P40429 | 60S ribosomal protein L13a                          | RPL13A  | 23.56  | 216.96 | 45.81 | 11 | 11 | 12 |
| Q00325 | Phosphate carrier protein, mitochondrial            | SLC25A3 | 40.07  | 212.90 | 12.71 | 4  | 4  | 5  |
| P52597 | Heterogeneous nuclear ribonucleoprotein F           | HNRNPF  | 45.64  | 211.35 | 10.36 | 1  | 3  | 6  |
| P61254 | 60S ribosomal protein L26                           | RPL26   | 17.25  | 210.79 | 49.66 | 2  | 11 | 12 |
| Q13310 | Polyadenylate-binding protein 4                     | PABPC4  | 70.74  | 209.98 | 13.51 | 1  | 7  | 8  |
| O60841 | Eukaryotic translation initiation factor 5B         | EIF5B   | 138.74 | 208.35 | 11.72 | 10 | 10 | 10 |
| O43290 | U4/U6.U5 tri-snRNP-associated protein 1             | SART1   | 90.20  | 207.47 | 12.50 | 6  | 6  | 7  |
| P61313 | 60S ribosomal protein L15                           | RPL15   | 24.13  | 204.37 | 38.24 | 9  | 9  | 10 |
| P62277 | 40S ribosomal protein S13                           | RPS13   | 17.21  | 203.83 | 29.80 | 5  | 5  | 6  |
| Q13247 | Serine/arginine-rich splicing factor 6              | SRSF6   | 39.56  | 202.01 | 18.31 | 4  | 7  | 7  |
| Q9Y2X3 | Nucleolar protein 58                                | NOP58   | 59.54  | 201.71 | 12.85 | 5  | 5  | 6  |
| Q9P035 | ery-long-chain (3R)-3-hydroxyacyl-CoA dehydratase   | HACD3   | 43.13  | 200.76 | 17.68 | 5  | 5  | 6  |
| Q15717 | ELAV-like protein 1                                 | ELAVL1  | 36.07  | 199.29 | 11.66 | 3  | 3  | 3  |
| Q15029 | 6 kDa U5 small nuclear ribonucleoprotein component  | EFTUD2  | 109.37 | 195.36 | 9.67  | 8  | 8  | 9  |
| P62241 | 40S ribosomal protein S8                            | RPS8    | 24.19  | 189.38 | 37.02 | 7  | 7  | 9  |
| Q96N67 | Dedicator of cytokinesis protein 7                  | DOCK7   | 242.41 | 187.91 | 2.94  | 5  | 5  | 6  |
| P07910 | Heterogeneous nuclear ribonucleoproteins C1/C2      | HNRNPC  | 33.65  | 187.46 | 29.41 | 7  | 7  | 9  |

|        |                                                |         |        |        |       |   |    |    |
|--------|------------------------------------------------|---------|--------|--------|-------|---|----|----|
| P10412 | Histone H1.4                                   | H1-4    | 21.85  | 186.73 | 26.94 | 1 | 7  | 8  |
| P62847 | 40S ribosomal protein S24                      | RPS24   | 15.41  | 186.35 | 39.85 | 6 | 6  | 11 |
| P12532 | Creatine kinase U-type, mitochondrial          | CKMT1A  | 47.01  | 186.02 | 28.30 | 7 | 7  | 8  |
| P62750 | 60S ribosomal protein L23a                     | RPL23A  | 17.68  | 185.18 | 47.44 | 8 | 8  | 10 |
| P16403 | Histone H1.2                                   | H1-2    | 21.35  | 184.11 | 27.70 | 1 | 7  | 8  |
| Q9UG63 | ATP-binding cassette sub-family F member 2     | ABCF2   | 71.25  | 182.80 | 13.64 | 7 | 7  | 10 |
| P62995 | Transformer-2 protein homolog beta             | TRA2B   | 33.65  | 181.02 | 24.65 | 6 | 6  | 7  |
| Q16629 | Serine/arginine-rich splicing factor 7         | SRSF7   | 27.35  | 181.02 | 28.57 | 6 | 7  | 10 |
| Q14444 | Caprin-1                                       | CAPRIN1 | 78.32  | 180.80 | 8.32  | 6 | 6  | 6  |
| P18124 | 60S ribosomal protein L7                       | RPL7    | 29.21  | 180.33 | 32.66 | 9 | 9  | 9  |
| P27635 | 60S ribosomal protein L10                      | RPL10   | 24.59  | 180.31 | 22.43 | 5 | 5  | 7  |
| P31943 | Heterogeneous nuclear ribonucleoprotein H      | HNRNPH1 | 49.20  | 180.28 | 14.70 | 3 | 5  | 7  |
| P50402 | Emerin                                         | EMD     | 28.98  | 179.41 | 11.42 | 2 | 2  | 3  |
| Q13243 | Serine/arginine-rich splicing factor 5         | SRSF5   | 31.25  | 178.65 | 19.12 | 4 | 5  | 6  |
| Q4VCS5 | Angiomotin                                     | AMOT    | 118.01 | 177.57 | 6.27  | 6 | 6  | 7  |
| Q5T9A4 | ATPase family AAA domain-containing protein 3B | ATAD3B  | 72.53  | 176.72 | 16.67 | 1 | 10 | 10 |
| Q92499 | ATP-dependent RNA helicase DDX1                | DDX1    | 82.38  | 175.08 | 14.73 | 8 | 8  | 9  |
| Q99459 | Cell division cycle 5-like protein             | CDC5L   | 92.19  | 174.98 | 9.48  | 6 | 6  | 6  |
| P62249 | 40S ribosomal protein S16                      | RPS16   | 16.44  | 174.27 | 32.88 | 5 | 5  | 7  |
| O00422 | Histone deacetylase complex subunit SAP18      | SAP18   | 17.55  | 174.10 | 37.25 | 6 | 6  | 7  |
| P61353 | 60S ribosomal protein L27                      | RPL27   | 15.79  | 173.75 | 47.06 | 6 | 6  | 7  |
| P16402 | Histone H1.3                                   | H1-3    | 22.34  | 173.15 | 26.70 | 1 | 7  | 8  |
| Q12905 | Interleukin enhancer-binding factor 2          | ILF2    | 43.04  | 172.79 | 14.36 | 4 | 4  | 5  |
| P11388 | DNA topoisomerase 2-alpha                      | TOP2A   | 174.28 | 171.48 | 5.09  | 4 | 6  | 6  |
| Q9UNX3 | 60S ribosomal protein L26-like 1               | RPL26L1 | 17.25  | 170.16 | 44.14 | 1 | 10 | 11 |
| Q9Y3Y2 | Chromatin target of PRMT1 protein              | CHTOP   | 26.38  | 169.37 | 10.48 | 2 | 2  | 3  |
| P84098 | 60S ribosomal protein L19                      | RPL19   | 23.45  | 169.26 | 30.61 | 6 | 6  | 8  |



|        |                                                  |         |        |        |       |   |   |    |
|--------|--------------------------------------------------|---------|--------|--------|-------|---|---|----|
| P08865 | 40S ribosomal protein SA                         | RPSA    | 32.83  | 169.11 | 15.25 | 3 | 3 | 3  |
| P05023 | dium/potassium-transporting ATPase subunit alpha | ATP1A1  | 112.82 | 168.44 | 8.11  | 6 | 6 | 6  |
| P30153 | protein phosphatase 2A 65 kDa regulatory subunit | PPP2R1A | 65.27  | 167.80 | 10.36 | 4 | 4 | 5  |
| P39019 | 40S ribosomal protein S19                        | RPS19   | 16.05  | 166.94 | 52.41 | 9 | 9 | 10 |
| P62987 | Ubiquitin-60S ribosomal protein L40              | UBA52   | 14.72  | 166.75 | 41.41 | 5 | 5 | 7  |
| P62851 | 40S ribosomal protein S25                        | RPS25   | 13.73  | 163.69 | 29.60 | 5 | 5 | 5  |
| P62280 | 40S ribosomal protein S11                        | RPS11   | 18.42  | 163.66 | 44.30 | 9 | 9 | 10 |
| Q02880 | DNA topoisomerase 2-beta                         | TOP2B   | 183.15 | 163.59 | 3.69  | 3 | 5 | 5  |
| O00425 | nsulin-like growth factor 2 mRNA-binding protein | IGF2BP3 | 63.67  | 162.60 | 6.91  | 2 | 3 | 4  |
| Q96PK6 | RNA-binding protein 14                           | RBM14   | 69.45  | 161.79 | 10.91 | 6 | 6 | 6  |
| P13639 | Elongation factor 2                              | EEF2    | 95.28  | 161.75 | 5.94  | 5 | 5 | 5  |
| P62258 | 14-3-3 protein epsilon                           | YWHAE   | 29.16  | 161.34 | 19.22 | 2 | 4 | 5  |
| O75531 | Barrier-to-autointegration factor                | BANF1   | 10.05  | 161.21 | 34.83 | 3 | 3 | 5  |
| P13647 | Keratin, type II cytoskeletal 5                  | KRT5    | 62.34  | 161.20 | 12.37 | 4 | 8 | 8  |
| P36542 | ATP synthase subunit gamma, mitochondrial        | ATP5F1C | 32.98  | 160.07 | 24.50 | 7 | 7 | 9  |
| Q9Y383 | Putative RNA-binding protein Luc7-like 2         | LUC7L2  | 46.49  | 158.31 | 17.35 | 4 | 6 | 7  |
| Q2NL82 | Pre-rRNA-processing protein TSR1 homolog         | TSR1    | 91.75  | 158.23 | 8.96  | 6 | 6 | 6  |
| P27708 | CAD protein                                      | CAD     | 242.83 | 157.50 | 2.74  | 5 | 5 | 5  |
| P31689 | DnaJ homolog subfamily A member 1                | DNAJA1  | 44.84  | 156.86 | 16.62 | 5 | 5 | 6  |
| P62917 | 60S ribosomal protein L8                         | RPL8    | 28.01  | 156.81 | 21.40 | 4 | 4 | 6  |
| P02533 | Keratin, type I cytoskeletal 14                  | KRT14   | 51.53  | 156.53 | 10.59 | 3 | 5 | 5  |
| P68104 | Elongation factor 1-alpha 1                      | EEF1A1  | 50.11  | 156.01 | 13.85 | 5 | 5 | 5  |
| O75494 | Serine/arginine-rich splicing factor 10          | SRSF10  | 31.28  | 153.92 | 17.18 | 4 | 4 | 5  |
| P62266 | 40S ribosomal protein S23                        | RPS23   | 15.80  | 151.75 | 23.78 | 4 | 4 | 7  |
| Q96SB4 | SRSF protein kinase 1                            | SRPK1   | 74.28  | 151.51 | 11.30 | 6 | 6 | 6  |
| P06753 | Tropomyosin alpha-3 chain                        | TPM3    | 32.93  | 149.20 | 22.81 | 3 | 7 | 7  |
| P62913 | 60S ribosomal protein L11                        | RPL11   | 20.24  | 149.04 | 28.09 | 5 | 5 | 5  |

|        |                                                       |          |        |        |       |   |   |   |
|--------|-------------------------------------------------------|----------|--------|--------|-------|---|---|---|
| Q15050 | Ribosome biogenesis regulatory protein homolog        | RRS1     | 41.17  | 146.09 | 13.42 | 3 | 3 | 4 |
| Q06787 | Synaptic functional regulator FMR1                    | FMR1     | 71.13  | 145.23 | 8.39  | 5 | 5 | 6 |
| Q9NX58 | Cell growth-regulating nucleolar protein              | LYAR     | 43.59  | 144.45 | 14.51 | 4 | 4 | 5 |
| Q8NC51 | asminogen activator inhibitor 1 RNA-binding prote     | SERBP1   | 44.94  | 144.09 | 10.54 | 3 | 3 | 4 |
| P62841 | 40S ribosomal protein S15                             | RPS15    | 17.03  | 143.49 | 31.03 | 5 | 5 | 7 |
| P26599 | Polypyrimidine tract-binding protein 1                | PTBP1    | 57.19  | 142.66 | 4.33  | 1 | 1 | 1 |
| P61978 | Heterogeneous nuclear ribonucleoprotein K             | HNRNPK   | 50.94  | 142.32 | 8.42  | 3 | 3 | 4 |
| P27348 | 14-3-3 protein theta                                  | YWHAQ    | 27.75  | 142.18 | 20.82 | 2 | 4 | 5 |
| Q9NVN8 | guanine nucleotide-binding protein-like 3-like protei | GNL3L    | 65.53  | 141.83 | 9.97  | 4 | 5 | 5 |
| P33993 | DNA replication licensing factor MCM7                 | MCM7     | 81.26  | 139.52 | 11.82 | 6 | 6 | 6 |
| P11177 | e dehydrogenase E1 component subunit beta, mitoc      | PDHB     | 39.21  | 136.84 | 13.93 | 4 | 4 | 4 |
| P07437 | Tubulin beta chain                                    | TUBB     | 49.64  | 136.25 | 10.81 | 4 | 4 | 5 |
| P67936 | Tropomyosin alpha-4 chain                             | TPM4     | 28.50  | 135.26 | 28.23 | 3 | 7 | 7 |
| P35249 | Replication factor C subunit 4                        | RFC4     | 39.66  | 134.04 | 20.39 | 6 | 6 | 6 |
| Q9BU76 | Multiple myeloma tumor-associated protein 2           | MMTAG2   | 29.39  | 133.77 | 17.11 | 4 | 4 | 4 |
| P60866 | 40S ribosomal protein S20                             | RPS20    | 13.36  | 133.30 | 19.33 | 2 | 2 | 3 |
| Q13595 | Transformer-2 protein homolog alpha                   | TRA2A    | 32.67  | 132.19 | 17.38 | 4 | 4 | 4 |
| Q02978 | Mitochondrial 2-oxoglutarate/malate carrier proteir   | SLC25A11 | 34.04  | 132.05 | 12.74 | 3 | 3 | 3 |
| P63010 | AP-2 complex subunit beta                             | AP2B1    | 104.49 | 131.59 | 4.91  | 3 | 3 | 4 |
| O14880 | Microsomal glutathione S-transferase 3                | MGST3    | 16.51  | 131.51 | 17.76 | 2 | 2 | 2 |
| P46779 | 60S ribosomal protein L28                             | RPL28    | 15.74  | 131.50 | 33.58 | 6 | 6 | 8 |
| Q13823 | Nucleolar GTP-binding protein 2                       | GNL2     | 83.60  | 131.49 | 6.70  | 4 | 4 | 4 |
| Q9NNW5 | WD repeat-containing protein 6                        | WDR6     | 121.65 | 130.38 | 3.75  | 3 | 3 | 4 |
| Q5T3I0 | G patch domain-containing protein 4                   | GPATCH4  | 50.35  | 129.28 | 17.71 | 7 | 7 | 9 |
| Q8TDN6 | Ribosome biogenesis protein BRX1 homolog              | BRX1     | 41.38  | 127.24 | 16.43 | 5 | 5 | 5 |
| P52701 | DNA mismatch repair protein Msh6                      | MSH6     | 152.69 | 126.31 | 3.90  | 4 | 4 | 5 |
| Q5T5X7 | BEN domain-containing protein 3                       | BEND3    | 94.42  | 126.30 | 9.06  | 6 | 6 | 6 |

|            |                                                      |          |        |        |       |   |   |   |
|------------|------------------------------------------------------|----------|--------|--------|-------|---|---|---|
| P49411     | Elongation factor Tu, mitochondrial                  | TUFM     | 49.51  | 125.90 | 9.51  | 3 | 3 | 4 |
| P14649     | Myosin light chain 6B                                | MYL6B    | 22.75  | 125.15 | 21.15 | 2 | 4 | 5 |
| Q13435     | Splicing factor 3B subunit 2                         | SF3B2    | 100.17 | 124.82 | 6.59  | 6 | 6 | 6 |
| Q9UJS0     | calcium-binding mitochondrial carrier protein Aralar | SLC25A13 | 74.13  | 124.04 | 8.89  | 4 | 4 | 4 |
| Q96A72     | Protein mago nashi homolog 2                         | MAGOHB   | 17.27  | 123.55 | 33.78 | 4 | 4 | 4 |
| Q96EY4     | Translation machinery-associated protein 16          | TMA16    | 23.85  | 122.12 | 17.24 | 2 | 2 | 2 |
| P11387     | DNA topoisomerase 1                                  | TOP1     | 90.67  | 118.54 | 10.07 | 7 | 7 | 7 |
| P40337     | von Hippel-Lindau disease tumor suppressor           | VHL      | 24.14  | 118.47 | 22.54 | 3 | 3 | 6 |
| Q9UHI6     | Probable ATP-dependent RNA helicase DDX20            | DDX20    | 92.18  | 118.17 | 4.13  | 2 | 2 | 2 |
| P46783     | 40S ribosomal protein S10                            | RPS10    | 18.89  | 117.16 | 33.33 | 5 | 5 | 8 |
| Q8NE71     | ATP-binding cassette sub-family F member 1           | ABCF1    | 95.87  | 116.63 | 8.76  | 5 | 5 | 5 |
| Q13151     | Heterogeneous nuclear ribonucleoprotein A0           | HNRNPA0  | 30.82  | 116.59 | 13.11 | 2 | 3 | 5 |
| A1L0T0     | 2-hydroxyacyl-CoA lyase 2                            | ILVBL    | 67.83  | 115.93 | 3.64  | 1 | 1 | 2 |
| P48634     | Protein PRRC2A                                       | PRRC2A   | 228.72 | 115.03 | 2.27  | 3 | 4 | 4 |
| P05198     | Eukaryotic translation initiation factor 2 subunit 1 | EIF2S1   | 36.09  | 114.71 | 23.17 | 7 | 7 | 7 |
| P12268     | Inosine-5'-monophosphate dehydrogenase 2             | IMPDH2   | 55.77  | 114.46 | 6.61  | 2 | 2 | 2 |
| Q8NCA5     | Protein FAM98A                                       | FAM98A   | 55.24  | 114.15 | 2.90  | 1 | 1 | 1 |
| Q8IY37     | Probable ATP-dependent RNA helicase DHX37            | DHX37    | 129.46 | 112.67 | 2.25  | 2 | 2 | 2 |
| P62306     | Small nuclear ribonucleoprotein F                    | SNRPF    | 9.72   | 112.28 | 15.12 | 1 | 1 | 2 |
| P49916     | DNA ligase 3                                         | LIG3     | 112.84 | 112.06 | 6.24  | 6 | 6 | 6 |
| Q02543     | 60S ribosomal protein L18a                           | RPL18A   | 20.75  | 111.23 | 27.27 | 6 | 6 | 7 |
| Q9NYL9     | Tropomodulin-3                                       | TMOD3    | 39.57  | 110.67 | 9.09  | 2 | 2 | 2 |
| O60506     | Heterogeneous nuclear ribonucleoprotein Q            | SYNCRIP  | 69.56  | 110.62 | 4.49  | 2 | 2 | 2 |
| A0A0A0MS14 | Immunoglobulin heavy variable 1-45                   | IGHV1-45 | 13.50  | 110.40 | 9.40  | 1 | 1 | 2 |
| Q9BZI7     | Regulator of nonsense transcripts 3B                 | UPF3B    | 57.73  | 110.17 | 10.97 | 5 | 5 | 5 |
| Q92621     | Nuclear pore complex protein Nup205                  | NUP205   | 227.78 | 109.68 | 1.89  | 3 | 3 | 3 |
| P0DN76     | Splicing factor U2AF 35 kDa subunit-like protein     | U2AF1L5  | 27.85  | 109.63 | 13.75 | 3 | 3 | 3 |

|        |                                                         |           |        |        |       |   |   |   |
|--------|---------------------------------------------------------|-----------|--------|--------|-------|---|---|---|
| Q13610 | Periodic tryptophan protein 1 homolog                   | PWP1      | 55.79  | 109.42 | 8.78  | 3 | 3 | 3 |
| P11021 | Endoplasmic reticulum chaperone BiP                     | HSPA5     | 72.29  | 108.12 | 4.28  | 1 | 2 | 2 |
| P22087 | rRNA 2'-O-methyltransferase fibrillar                   | FBL       | 33.76  | 107.03 | 13.40 | 3 | 3 | 3 |
| Q9H583 | HEAT repeat-containing protein 1                        | HEATR1    | 242.22 | 104.73 | 1.73  | 3 | 3 | 3 |
| Q14690 | Protein RRP5 homolog                                    | PDCD11    | 208.57 | 103.90 | 1.71  | 3 | 3 | 3 |
| P16615 | Cytoplasmic/endoplasmic reticulum calcium ATPase        | ATP2A2    | 114.68 | 102.85 | 3.84  | 3 | 3 | 3 |
| Q9HCE1 | Helicase MOV-10                                         | MOV10     | 113.60 | 102.58 | 6.68  | 6 | 6 | 6 |
| P17812 | CTP synthase 1                                          | CTPS1     | 66.65  | 102.47 | 8.46  | 4 | 4 | 4 |
| P50914 | 60S ribosomal protein L14                               | RPL14     | 23.42  | 101.91 | 25.58 | 6 | 6 | 6 |
| Q07666 | Containing, RNA-binding, signal transduction-associated | KHDRBS1   | 48.20  | 101.90 | 7.67  | 2 | 2 | 4 |
| P49368 | T-complex protein 1 subunit gamma                       | CCT3      | 60.50  | 101.54 | 5.87  | 3 | 3 | 3 |
| P56192 | Methionine--tRNA ligase, cytoplasmic                    | MARS1     | 101.05 | 101.50 | 3.67  | 2 | 2 | 2 |
| P46778 | 60S ribosomal protein L21                               | RPL21     | 18.55  | 101.09 | 36.25 | 6 | 6 | 8 |
| Q53GS9 | U4/U6.U5 tri-snRNP-associated protein 2                 | USP39     | 65.34  | 100.69 | 6.19  | 2 | 2 | 3 |
| P11586 | C-1-tetrahydrofolate synthase, cytoplasmic              | MTHFD1    | 101.50 | 100.58 | 3.64  | 3 | 3 | 3 |
| Q13724 | Mannosyl-oligosaccharide glucosidase                    | MOGS      | 91.86  | 100.36 | 3.58  | 2 | 2 | 3 |
| P47914 | 60S ribosomal protein L29                               | RPL29     | 17.74  | 100.18 | 14.47 | 2 | 2 | 2 |
| Q14739 | Delta(14)-sterol reductase LBR                          | LBR       | 70.66  | 99.76  | 4.88  | 2 | 2 | 2 |
| P35250 | Replication factor C subunit 2                          | RFC2      | 39.13  | 98.94  | 13.28 | 4 | 4 | 4 |
| Q9UNQ2 | Probable dimethyladenosine transferase                  | DIMT1     | 35.21  | 98.92  | 12.46 | 3 | 3 | 4 |
| O75367 | Core histone macro-H2A.1                                | MACROH2A1 | 39.59  | 98.46  | 12.63 | 3 | 3 | 3 |
| P11310 | m-chain specific acyl-CoA dehydrogenase, mitochondrial  | ACADM     | 46.56  | 98.43  | 15.68 | 6 | 6 | 6 |
| O00139 | Kinesin-like protein KIF2A                              | KIF2A     | 79.91  | 98.17  | 5.10  | 4 | 4 | 4 |
| P36873 | Protein phosphatase PP1-gamma catalytic                 | PPP1CC    | 36.96  | 98.07  | 11.15 | 3 | 3 | 3 |
| Q13573 | SNW domain-containing protein 1                         | SNW1      | 61.46  | 97.83  | 6.90  | 2 | 2 | 3 |
| P37108 | Signal recognition particle 14 kDa protein              | SRP14     | 14.56  | 97.64  | 19.85 | 2 | 2 | 2 |
| Q15233 | Ion-POU domain-containing octamer-binding protein       | NONO      | 54.20  | 96.42  | 2.76  | 1 | 1 | 1 |

|        |                                                     |         |        |       |       |   |   |   |
|--------|-----------------------------------------------------|---------|--------|-------|-------|---|---|---|
| Q9Y5S9 | RNA-binding protein 8A                              | RBM8A   | 19.88  | 96.06 | 25.86 | 2 | 2 | 2 |
| Q8WWM7 | Ataxin-2-like protein                               | ATXN2L  | 113.30 | 96.04 | 5.58  | 4 | 4 | 4 |
| Q14684 | Ribosomal RNA processing protein 1 homolog B        | RRP1B   | 84.38  | 94.84 | 10.42 | 6 | 6 | 7 |
| P45880 | Voltage-dependent anion-selective channel protein 2 | VDAC2   | 31.55  | 94.83 | 17.01 | 4 | 4 | 4 |
| P14866 | Heterogeneous nuclear ribonucleoprotein L           | HNRNPL  | 64.09  | 94.60 | 7.47  | 2 | 2 | 3 |
| Q9NQ29 | Putative RNA-binding protein Luc7-like 1            | LUC7L   | 43.70  | 93.86 | 12.94 | 2 | 4 | 5 |
| Q9BRJ6 | Uncharacterized protein C7orf50                     | C7orf50 | 22.07  | 93.86 | 24.23 | 3 | 3 | 3 |
| P48729 | Casein kinase I isoform alpha                       | CSNK1A1 | 38.89  | 93.45 | 6.23  | 1 | 1 | 1 |
| P43243 | Matrin-3                                            | MATR3   | 94.57  | 93.02 | 5.90  | 3 | 3 | 3 |
| P22695 | Cytochrome b-c1 complex subunit 2, mitochondrial    | UQCRC2  | 48.41  | 92.85 | 10.82 | 3 | 3 | 3 |
| Q96T37 | RNA-binding protein 15                              | RBM15   | 107.12 | 92.59 | 4.91  | 3 | 3 | 3 |
| P42677 | 40S ribosomal protein S27                           | RPS27   | 9.46   | 91.97 | 29.76 | 3 | 3 | 3 |
| Q9Y3Z3 | ynucleoside triphosphate triphosphohydrolase SAM    | SAMHD1  | 72.16  | 91.70 | 5.43  | 3 | 3 | 3 |
| Q9UPN6 | SR-related and CTD-associated factor 8              | SCAF8   | 140.43 | 91.60 | 2.05  | 3 | 3 | 3 |
| P04908 | Histone H2A type 1-B/E                              | H2AC4   | 14.13  | 91.34 | 21.54 | 1 | 2 | 4 |
| Q9Y2R4 | Probable ATP-dependent RNA helicase DDX52           | DDX52   | 67.46  | 91.03 | 5.84  | 2 | 2 | 4 |
| Q13155 | tRNA synthase complex-interacting multifunctional   | AIMP2   | 35.33  | 90.89 | 10.00 | 2 | 2 | 2 |
| Q5F1R6 | DnaJ homolog subfamily C member 21                  | DNAJC21 | 61.99  | 90.30 | 3.01  | 1 | 1 | 1 |
| P53621 | Coatomer subunit alpha                              | COPA    | 138.26 | 89.49 | 5.23  | 5 | 5 | 5 |
| Q96IX5 | TP synthase membrane subunit DAPIT, mitochondr      | ATP5MD  | 6.45   | 89.38 | 25.86 | 1 | 1 | 1 |
| Q13242 | Serine/arginine-rich splicing factor 9              | SRSF9   | 25.53  | 89.19 | 20.36 | 4 | 4 | 4 |
| Q10570 | verage and polyadenylation specificity factor subun | CPSF1   | 160.78 | 88.89 | 1.18  | 1 | 1 | 1 |
| P46776 | 60S ribosomal protein L27a                          | RPL27A  | 16.55  | 88.59 | 14.19 | 2 | 2 | 2 |
| Q08945 | FACT complex subunit SSRP1                          | SSRP1   | 81.02  | 88.39 | 11.14 | 7 | 7 | 7 |
| Q96GQ7 | Probable ATP-dependent RNA helicase DDX27           | DDX27   | 89.78  | 88.04 | 6.66  | 4 | 4 | 4 |
| P62861 | 40S ribosomal protein S30                           | FAU     | 6.64   | 87.91 | 32.20 | 3 | 3 | 4 |
| P35268 | 60S ribosomal protein L22                           | RPL22   | 14.78  | 87.66 | 23.44 | 3 | 3 | 3 |

|            |                                                   |           |        |       |       |   |   |   |
|------------|---------------------------------------------------|-----------|--------|-------|-------|---|---|---|
| P61160     | Actin-related protein 2                           | ACTR2     | 44.73  | 86.67 | 9.39  | 3 | 3 | 3 |
| Q7Z2W4     | Zinc finger CCCH-type antiviral protein 1         | ZC3HAV1   | 101.37 | 86.49 | 3.33  | 2 | 2 | 2 |
| O60884     | DnaJ homolog subfamily A member 2                 | DNAJA2    | 45.72  | 86.39 | 10.19 | 3 | 3 | 4 |
| P62316     | Small nuclear ribonucleoprotein Sm D2             | SNRPD2    | 13.52  | 86.32 | 30.51 | 4 | 4 | 4 |
| Q9Y5B9     | FACT complex subunit SPT16                        | SUPT16H   | 119.84 | 86.30 | 3.44  | 3 | 3 | 3 |
| Q86UE4     | Protein LYRIC                                     | MTDH      | 63.80  | 85.78 | 8.59  | 4 | 4 | 4 |
| O75607     | Nucleoplasmin-3                                   | NPM3      | 19.33  | 85.19 | 8.99  | 1 | 1 | 1 |
| Q9NS69     | mitochondrial import receptor subunit TOM22 homol | TOMM22    | 15.51  | 85.03 | 16.20 | 2 | 2 | 2 |
| P23246     | Splicing factor, proline- and glutamine-rich      | SFPQ      | 76.10  | 84.98 | 6.93  | 4 | 4 | 4 |
| Q9BVI4     | Nucleolar complex protein 4 homolog               | NOC4L     | 58.43  | 84.92 | 9.30  | 3 | 3 | 3 |
| P84090     | Enhancer of rudimentary homolog                   | ERH       | 12.25  | 84.75 | 33.65 | 4 | 4 | 5 |
| P24390     | ER lumen protein-retaining receptor 1             | KDELR1    | 24.53  | 84.33 | 5.19  | 1 | 1 | 2 |
| A0A075B6S2 | Immunoglobulin kappa variable 2D-29               | IGKV2D-29 | 13.14  | 83.96 | 16.67 | 2 | 2 | 2 |
| Q9Y5V3     | Melanoma-associated antigen D1                    | MAGED1    | 86.11  | 83.70 | 1.93  | 1 | 1 | 1 |
| Q15393     | Splicing factor 3B subunit 3                      | SF3B3     | 135.49 | 83.05 | 4.77  | 5 | 5 | 5 |
| Q7Z7K6     | Centromere protein V                              | CENPV     | 29.93  | 82.02 | 9.45  | 2 | 2 | 2 |
| P55060     | Exportin-2                                        | CSE1L     | 110.35 | 80.71 | 1.75  | 1 | 1 | 1 |
| Q9Y520     | Protein PRRC2C                                    | PRRC2C    | 316.72 | 80.57 | 1.14  | 2 | 3 | 4 |
| P62910     | 60S ribosomal protein L32                         | RPL32     | 15.85  | 80.30 | 28.15 | 4 | 4 | 4 |
| P05141     | ADP/ATP translocase 2                             | SLC25A5   | 32.83  | 80.08 | 13.09 | 4 | 4 | 4 |
| Q9H307     | Pinin                                             | PNN       | 81.58  | 79.45 | 5.16  | 3 | 3 | 3 |
| Q9H0D6     | 5'-3' exoribonuclease 2                           | XRN2      | 108.51 | 78.94 | 6.21  | 5 | 5 | 5 |
| P0DP23     | Calmodulin-1                                      | CALM1     | 16.83  | 78.87 | 16.11 | 3 | 3 | 4 |
| Q96P70     | Importin-9                                        | IPO9      | 115.89 | 77.59 | 2.59  | 2 | 2 | 2 |
| Q92616     | eIF-2-alpha kinase activator GCN1                 | GCN1      | 292.57 | 77.18 | 0.71  | 1 | 1 | 2 |
| Q99848     | Probable rRNA-processing protein EBP2             | EBNA1BP2  | 34.83  | 77.12 | 7.19  | 1 | 1 | 1 |
| Q58FF6     | Putative heat shock protein HSP 90-beta 4         | HSP90AB4P | 58.23  | 75.86 | 8.32  | 1 | 4 | 4 |

|        |                                                         |         |        |       |       |   |   |   |
|--------|---------------------------------------------------------|---------|--------|-------|-------|---|---|---|
| Q92522 | Histone H1.10                                           | H1-10   | 22.47  | 75.85 | 12.68 | 2 | 2 | 2 |
| Q9P0J0 | Dehydrogenase [ubiquinone] 1 alpha subcomplex subunit   | NDUFA13 | 16.69  | 74.81 | 18.06 | 2 | 2 | 2 |
| Q9BRL6 | Serine/arginine-rich splicing factor 8                  | SRSF8   | 32.27  | 74.58 | 10.64 | 1 | 3 | 3 |
| O95782 | AP-2 complex subunit alpha-1                            | AP2A1   | 107.48 | 74.45 | 2.97  | 2 | 2 | 2 |
| Q86YZ3 | Hornerin                                                | HRNR    | 282.23 | 74.29 | 3.58  | 2 | 2 | 2 |
| O14925 | Mitochondrial import inner membrane translocase subunit | TIMM23  | 21.93  | 74.17 | 8.13  | 1 | 1 | 1 |
| P02768 | Albumin                                                 | ALB     | 69.32  | 74.01 | 2.46  | 1 | 1 | 2 |
| P08559 | Dehydrogenase E1 component subunit alpha, somatic form  | PDHA1   | 43.27  | 73.94 | 3.33  | 1 | 1 | 1 |
| Q14694 | Ubiquitin carboxyl-terminal hydrolase 10                | USP10   | 87.08  | 73.85 | 3.38  | 2 | 2 | 2 |
| Q14980 | Nuclear mitotic apparatus protein 1                     | NUMA1   | 238.12 | 73.51 | 1.51  | 2 | 2 | 2 |
| P46782 | 40S ribosomal protein S5                                | RPS5    | 22.86  | 73.33 | 25.00 | 5 | 5 | 6 |
| Q99873 | Protein arginine N-methyltransferase 1                  | PRMT1   | 42.43  | 72.69 | 3.23  | 1 | 1 | 1 |
| O95232 | Luc7-like protein 3                                     | LUC7L3  | 51.44  | 72.39 | 6.94  | 2 | 2 | 2 |
| P49458 | Signal recognition particle 9 kDa protein               | SRP9    | 10.11  | 72.27 | 22.09 | 2 | 2 | 2 |
| P62820 | Ras-related protein Rab-1A                              | RAB1A   | 22.66  | 72.13 | 13.17 | 2 | 2 | 2 |
| Q9UJZ1 | Stomatolysin-like protein 2, mitochondrial              | STOML2  | 38.51  | 72.04 | 4.21  | 1 | 1 | 1 |
| A4D1E9 | GTP-binding protein 10                                  | GTPBP10 | 42.91  | 71.80 | 6.20  | 2 | 2 | 2 |
| P49756 | RNA-binding protein 25                                  | RBM25   | 100.12 | 71.75 | 9.25  | 6 | 6 | 6 |
| Q86VM9 | Zinc finger CCCH domain-containing protein 18           | ZC3H18  | 106.32 | 71.64 | 1.99  | 1 | 1 | 1 |
| Q5RKV6 | Exosome complex component MTR3                          | EXOSC6  | 28.22  | 71.63 | 11.40 | 2 | 2 | 2 |
| P41250 | Glycyl-tRNA synthetase                                  | GARS1   | 83.11  | 71.45 | 1.76  | 1 | 1 | 1 |
| P13010 | X-ray repair cross-complementing protein 5              | XRCC5   | 82.65  | 70.95 | 4.64  | 2 | 2 | 2 |
| P59998 | Actin-related protein 2/3 complex subunit 4             | ARPC4   | 19.65  | 70.57 | 21.43 | 4 | 4 | 4 |
| O43795 | Unconventional myosin-Ib                                | MYO1B   | 131.90 | 69.76 | 3.70  | 4 | 4 | 4 |
| Q8TEX9 | Importin-4                                              | IPO4    | 118.64 | 69.54 | 1.02  | 1 | 1 | 1 |
| P28288 | ATP-binding cassette sub-family D member 3              | ABCD3   | 75.43  | 69.47 | 3.95  | 2 | 2 | 2 |
| P62854 | 40S ribosomal protein S26                               | RPS26   | 13.01  | 69.28 | 32.17 | 3 | 3 | 3 |

|        |                                                   |         |        |       |       |   |   |   |
|--------|---------------------------------------------------|---------|--------|-------|-------|---|---|---|
| P84103 | Serine/arginine-rich splicing factor 3            | SRSF3   | 19.32  | 69.23 | 14.02 | 1 | 2 | 3 |
| P49327 | Fatty acid synthase                               | FASN    | 273.25 | 68.80 | 0.68  | 1 | 1 | 1 |
| Q9BQ67 | Glutamate-rich WD repeat-containing protein 1     | GRWD1   | 49.39  | 68.65 | 3.59  | 1 | 1 | 2 |
| Q9BYN8 | 28S ribosomal protein S26, mitochondrial          | MRPS26  | 24.20  | 68.22 | 14.15 | 2 | 2 | 2 |
| Q9BY77 | Polymerase delta-interacting protein 3            | POLDIP3 | 46.06  | 68.05 | 10.93 | 4 | 4 | 4 |
| O95373 | Importin-7                                        | IPO7    | 119.44 | 68.04 | 2.50  | 2 | 2 | 2 |
| P0DOX8 | Immunoglobulin lambda-1 light chain               | ---     | 22.82  | 68.03 | 7.41  | 3 | 3 | 3 |
| P55209 | Nucleosome assembly protein 1-like 1              | NAP1L1  | 45.35  | 67.14 | 9.97  | 3 | 3 | 3 |
| Q6P1L8 | 39S ribosomal protein L14, mitochondrial          | MRPL14  | 15.94  | 67.00 | 15.17 | 2 | 2 | 3 |
| P62857 | 40S ribosomal protein S28                         | RPS28   | 7.84   | 65.76 | 30.43 | 2 | 2 | 2 |
| O00541 | Pescadillo homolog                                | PES1    | 67.96  | 65.66 | 4.93  | 3 | 3 | 3 |
| Q15024 | Exosome complex component RRP42                   | EXOSC7  | 31.80  | 65.14 | 5.15  | 1 | 1 | 1 |
| Q9BQ39 | ATP-dependent RNA helicase DDX50                  | DDX50   | 82.51  | 64.80 | 5.16  | 2 | 3 | 3 |
| Q86U38 | Nucleolar protein 9                               | NOP9    | 69.39  | 64.49 | 2.36  | 1 | 1 | 1 |
| P19525 | on-induced, double-stranded RNA-activated protein | EIF2AK2 | 62.06  | 63.78 | 4.72  | 2 | 2 | 2 |
| P56134 | ATP synthase subunit f, mitochondrial             | ATP5MF  | 10.91  | 63.43 | 11.70 | 1 | 1 | 1 |
| P42766 | 60S ribosomal protein L35                         | RPL35   | 14.54  | 63.26 | 22.76 | 4 | 4 | 6 |
| P04004 | Vitronectin                                       | VTN     | 54.27  | 63.20 | 3.14  | 1 | 1 | 1 |
| P08243 | Asparagine synthetase [glutamine-hydrolyzing]     | ASNS    | 64.33  | 62.79 | 2.50  | 1 | 1 | 1 |
| P55072 | Transitional endoplasmic reticulum ATPase         | VCP     | 89.27  | 62.77 | 2.11  | 1 | 1 | 1 |
| P62195 | 26S proteasome regulatory subunit 8               | PSMC5   | 45.60  | 62.68 | 3.20  | 1 | 1 | 1 |
| P24539 | TP synthase F(0) complex subunit B1, mitochondri  | ATP5PB  | 28.89  | 62.63 | 4.69  | 1 | 1 | 1 |
| P38919 | Eukaryotic initiation factor 4A-III               | EIF4A3  | 46.84  | 62.37 | 8.03  | 3 | 3 | 4 |
| Q9Y4Y9 | U6 snRNA-associated Sm-like protein LSM5          | LSM5    | 9.93   | 62.32 | 20.88 | 1 | 1 | 1 |
| Q9NZM5 | Ribosome biogenesis protein NOP53                 | NOP53   | 54.36  | 62.14 | 3.77  | 1 | 1 | 1 |
| P42285 | Exosome RNA helicase MTR4                         | MTREX   | 117.73 | 62.09 | 2.40  | 2 | 2 | 2 |
| Q86WJ1 | Chromodomain-helicase-DNA-binding protein 1-lik   | CHD1L   | 100.94 | 61.91 | 3.23  | 2 | 2 | 2 |



|        |                                                    |         |        |       |       |   |   |   |
|--------|----------------------------------------------------|---------|--------|-------|-------|---|---|---|
| P35251 | Replication factor C subunit 1                     | RFC1    | 128.18 | 61.21 | 2.00  | 2 | 2 | 2 |
| Q12906 | Interleukin enhancer-binding factor 3              | ILF3    | 95.28  | 60.97 | 6.15  | 5 | 5 | 5 |
| Q00610 | Clathrin heavy chain 1                             | CLTC    | 191.49 | 60.05 | 1.25  | 2 | 2 | 2 |
| P52434 | directed RNA polymerases I, II, and III subunit RP | POLR2H  | 17.13  | 60.01 | 8.67  | 1 | 1 | 1 |
| P48643 | T-complex protein 1 subunit epsilon                | CCT5    | 59.63  | 59.76 | 4.07  | 2 | 2 | 2 |
| P48047 | ATP synthase subunit O, mitochondrial              | ATP5PO  | 23.26  | 59.37 | 12.21 | 2 | 2 | 2 |
| P10599 | Thioredoxin                                        | TXN     | 11.73  | 59.18 | 12.38 | 1 | 1 | 1 |
| P23528 | Cofilin-1                                          | CFL1    | 18.49  | 59.13 | 18.67 | 2 | 2 | 2 |
| Q07021 | nt component 1 Q subcomponent-binding protein, m   | C1QBP   | 31.34  | 58.97 | 4.96  | 2 | 2 | 2 |
| O75152 | Zinc finger CCCH domain-containing protein 11A     | ZC3H11A | 89.08  | 58.70 | 2.72  | 1 | 1 | 1 |
| P07195 | L-lactate dehydrogenase B chain                    | LDHB    | 36.62  | 58.58 | 4.49  | 1 | 1 | 1 |
| Q92552 | 28S ribosomal protein S27, mitochondrial           | MRPS27  | 47.58  | 58.45 | 6.52  | 2 | 2 | 2 |
| P60891 | Ribose-phosphate pyrophosphokinase 1               | PRPS1   | 34.81  | 58.44 | 12.89 | 4 | 4 | 4 |
| O60832 | H/ACA ribonucleoprotein complex subunit DKC1       | DKC1    | 57.64  | 58.26 | 8.56  | 3 | 3 | 3 |
| Q3ZCQ8 | ondrial import inner membrane translocase subunit  | TIMM50  | 39.62  | 57.40 | 7.93  | 2 | 2 | 2 |
| Q9NZ01 | Very-long-chain enoyl-CoA reductase                | TECR    | 36.01  | 57.19 | 10.06 | 3 | 3 | 3 |
| Q86YT6 | E3 ubiquitin-protein ligase MIB1                   | MIB1    | 110.07 | 56.98 | 1.29  | 1 | 1 | 1 |
| O95573 | Long-chain-fatty-acid--CoA ligase 3                | ACSL3   | 80.37  | 56.86 | 2.50  | 1 | 1 | 1 |
| Q96T60 | Bifunctional polynucleotide phosphatase/kinase     | PNKP    | 57.04  | 56.59 | 4.41  | 2 | 2 | 2 |
| P19623 | Spermidine synthase                                | SRM     | 33.80  | 56.39 | 2.65  | 1 | 1 | 1 |
| Q3MHD2 | Protein LSM12 homolog                              | LSM12   | 21.69  | 56.35 | 7.18  | 1 | 1 | 1 |
| Q9NYV4 | Cyclin-dependent kinase 12                         | CDK12   | 164.05 | 55.90 | 1.28  | 2 | 2 | 2 |
| P12004 | Proliferating cell nuclear antigen                 | PCNA    | 28.75  | 55.89 | 16.09 | 4 | 4 | 4 |
| P62318 | Small nuclear ribonucleoprotein Sm D3              | SNRPD3  | 13.91  | 55.76 | 15.08 | 2 | 2 | 2 |
| P17987 | T-complex protein 1 subunit alpha                  | TCP1    | 60.31  | 55.51 | 2.16  | 1 | 1 | 1 |
| Q2M1P5 | Kinesin-like protein KIF7                          | KIF7    | 150.50 | 55.38 | 1.34  | 1 | 1 | 1 |
| Q9P2I0 | avage and polyadenylation specificity factor subun | CPSF2   | 88.43  | 55.36 | 1.66  | 1 | 1 | 1 |

|        |                                                     |         |        |       |       |   |   |   |
|--------|-----------------------------------------------------|---------|--------|-------|-------|---|---|---|
| Q8N3R9 | MAGUK p55 subfamily member 5                        | MPP5    | 77.25  | 55.30 | 1.78  | 1 | 1 | 1 |
| Q9BRX2 | Protein pelota homolog                              | PELO    | 43.33  | 55.02 | 3.64  | 1 | 1 | 1 |
| O00410 | Importin-5                                          | IPO5    | 123.55 | 54.89 | 1.82  | 1 | 1 | 1 |
| Q86VP6 | Cullin-associated NEDD8-dissociated protein 1       | CAND1   | 136.29 | 54.58 | 1.95  | 2 | 2 | 2 |
| Q9H7B2 | Ribosome production factor 2 homolog                | RPF2    | 35.56  | 54.40 | 5.56  | 1 | 1 | 1 |
| Q49A26 | Putative oxidoreductase GLYR1                       | GLYR1   | 60.51  | 54.40 | 2.35  | 1 | 1 | 1 |
| P61204 | ADP-ribosylation factor 3                           | ARF3    | 20.59  | 54.33 | 4.42  | 1 | 1 | 1 |
| Q8IZL8 | Proline-, glutamic acid- and leucine-rich protein 1 | PELP1   | 119.62 | 54.04 | 1.24  | 1 | 1 | 1 |
| O15143 | Actin-related protein 2/3 complex subunit 1B        | ARPC1B  | 40.92  | 53.04 | 7.53  | 2 | 2 | 2 |
| Q5JTH9 | RRP12-like protein                                  | RRP12   | 143.61 | 52.85 | 3.32  | 3 | 3 | 3 |
| P60468 | Protein transport protein Sec61 subunit beta        | SEC61B  | 9.97   | 52.81 | 15.63 | 1 | 1 | 1 |
| Q9UKD2 | mRNA turnover protein 4 homolog                     | MRTO4   | 27.54  | 52.72 | 6.28  | 1 | 1 | 2 |
| P46087 | able 28S rRNA (cytosine(4447)-C(5))-methyltransf    | NOP2    | 89.25  | 52.61 | 3.08  | 2 | 2 | 2 |
| Q8NEJ9 | Neuroguidin                                         | NGDN    | 35.87  | 52.34 | 5.71  | 1 | 1 | 1 |
| Q9H223 | EH domain-containing protein 4                      | EHD4    | 61.14  | 52.29 | 2.03  | 1 | 1 | 1 |
| P61927 | 60S ribosomal protein L37                           | RPL37   | 11.07  | 52.03 | 7.22  | 2 | 2 | 2 |
| Q5SW79 | Centrosomal protein of 170 kDa                      | CEP170  | 175.19 | 50.96 | 1.01  | 1 | 1 | 1 |
| Q9H7E9 | UPF0488 protein C8orf33                             | C8orf33 | 24.98  | 50.94 | 9.61  | 2 | 2 | 2 |
| Q6P3X3 | Tetratricopeptide repeat protein 27                 | TTC27   | 96.57  | 50.84 | 1.54  | 1 | 1 | 1 |
| Q9C0J8 | pre-mRNA 3' end processing protein WDR33            | WDR33   | 145.80 | 50.74 | 0.97  | 1 | 1 | 1 |
| Q9NVP1 | ATP-dependent RNA helicase DDX18                    | DDX18   | 75.36  | 50.73 | 1.49  | 1 | 1 | 1 |
| Q9GZR7 | ATP-dependent RNA helicase DDX24                    | DDX24   | 96.27  | 50.62 | 1.63  | 1 | 1 | 1 |
| Q9BSD7 | Cancer-related nucleoside-triphosphatase            | NTPCR   | 20.70  | 50.45 | 12.11 | 2 | 2 | 2 |
| P51398 | 28S ribosomal protein S29, mitochondrial            | DAP3    | 45.54  | 50.37 | 5.03  | 1 | 1 | 1 |
| O15226 | NF-kappa-B-repressing factor                        | NKRF    | 77.62  | 50.18 | 1.59  | 1 | 1 | 1 |
| O95433 | ivator of 90 kDa heat shock protein ATPase homolo   | AHSA1   | 38.25  | 50.13 | 6.51  | 1 | 1 | 1 |
| O95299 | genase [ubiquinone] 1 alpha subcomplex subunit 10   | NDUFA10 | 40.73  | 49.91 | 6.20  | 1 | 1 | 1 |

|        |                                                       |          |        |       |       |   |   |   |
|--------|-------------------------------------------------------|----------|--------|-------|-------|---|---|---|
| Q96BW9 | Phosphatidate cytidyltransferase, mitochondrial       | TAMM41   | 51.03  | 49.86 | 2.88  | 1 | 1 | 1 |
| P50990 | T-complex protein 1 subunit theta                     | CCT8     | 59.58  | 49.83 | 1.82  | 1 | 1 | 1 |
| Q9H6R4 | Nucleolar protein 6                                   | NOL6     | 127.51 | 49.60 | 1.40  | 1 | 1 | 1 |
| P53680 | AP-2 complex subunit sigma                            | AP2S1    | 17.01  | 49.38 | 4.93  | 1 | 1 | 1 |
| O43390 | Heterogeneous nuclear ribonucleoprotein R             | HNRNPR   | 70.90  | 49.35 | 4.74  | 2 | 2 | 2 |
| P18085 | ADP-ribosylation factor 4                             | ARF4     | 20.50  | 49.19 | 4.44  | 1 | 1 | 1 |
| Q15366 | Poly(rC)-binding protein 2                            | PCBP2    | 38.56  | 49.15 | 6.58  | 2 | 2 | 2 |
| Q8TB52 | F-box only protein 30                                 | FBXO30   | 82.25  | 48.54 | 1.88  | 1 | 1 | 1 |
| A8MWD9 | active small nuclear ribonucleoprotein G-like protein | SNRPGP15 | 8.54   | 48.14 | 15.79 | 1 | 1 | 1 |
| Q9Y295 | Developmentally-regulated GTP-binding protein 1       | DRG1     | 40.52  | 48.14 | 3.81  | 1 | 1 | 1 |
| O15381 | Nuclear valosin-containing protein-like               | NVL      | 94.99  | 47.64 | 2.80  | 2 | 2 | 2 |
| Q12788 | Transducin beta-like protein 3                        | TBL3     | 88.98  | 47.58 | 4.21  | 3 | 3 | 3 |
| P82933 | 28S ribosomal protein S9, mitochondrial               | MRPS9    | 45.81  | 47.37 | 3.28  | 1 | 1 | 1 |
| Q6P158 | Putative ATP-dependent RNA helicase DHX57             | DHX57    | 155.51 | 46.66 | 1.01  | 1 | 1 | 1 |
| Q9NXF1 | Testis-expressed protein 10                           | TEX10    | 105.61 | 46.57 | 2.15  | 2 | 2 | 2 |
| P38646 | Stress-70 protein, mitochondrial                      | HSPA9    | 73.64  | 46.45 | 3.98  | 2 | 2 | 2 |
| Q14103 | Heterogeneous nuclear ribonucleoprotein D0            | HNRNPD   | 38.41  | 46.43 | 3.94  | 1 | 1 | 1 |
| Q9BVJ6 | small nucleolar RNA-associated protein 14 homolog     | UTP14A   | 87.92  | 46.09 | 1.43  | 1 | 1 | 1 |
| Q86W42 | THO complex subunit 6 homolog                         | THOC6    | 37.51  | 46.08 | 5.57  | 1 | 1 | 1 |
| Q9NY93 | Probable ATP-dependent RNA helicase DDX56             | DDX56    | 61.55  | 46.07 | 5.85  | 3 | 3 | 3 |
| Q8NB90 | ATPase family protein 2 homolog                       | SPATA5   | 97.84  | 46.05 | 1.34  | 1 | 1 | 1 |
| Q01780 | Exosome component 10                                  | EXOSC10  | 100.77 | 45.91 | 1.47  | 1 | 1 | 1 |
| P62826 | GTP-binding nuclear protein Ran                       | RAN      | 24.41  | 45.79 | 13.89 | 3 | 3 | 3 |
| P07741 | Adenine phosphoribosyltransferase                     | APRT     | 19.60  | 45.64 | 7.22  | 1 | 1 | 1 |
| P52907 | F-actin-capping protein subunit alpha-1               | CAPZA1   | 32.90  | 45.50 | 8.74  | 2 | 2 | 2 |
| P53618 | Coatamer subunit beta                                 | COPB1    | 107.07 | 45.47 | 2.52  | 2 | 2 | 2 |
| P16989 | Y-box-binding protein 3                               | YBX3     | 40.07  | 45.43 | 9.95  | 1 | 2 | 2 |

|        |                                                       |        |        |       |       |   |   |   |
|--------|-------------------------------------------------------|--------|--------|-------|-------|---|---|---|
| Q9NQT5 | Exosome complex component RRP40                       | EXOSC3 | 29.55  | 45.34 | 5.45  | 1 | 1 | 1 |
| Q9H2U1 | ATP-dependent DNA/RNA helicase DHX36                  | DHX36  | 114.69 | 45.30 | 1.39  | 1 | 1 | 1 |
| Q9Y2X9 | Zinc finger protein 281                               | ZNF281 | 96.86  | 45.29 | 3.80  | 2 | 2 | 2 |
| P08574 | Cytochrome c1, heme protein, mitochondrial            | CYC1   | 35.40  | 45.24 | 2.15  | 1 | 1 | 1 |
| P32119 | Peroxiredoxin-2                                       | PRDX2  | 21.88  | 45.14 | 8.59  | 1 | 1 | 1 |
| O94906 | Pre-mRNA-processing factor 6                          | PRPF6  | 106.86 | 45.13 | 0.96  | 1 | 1 | 1 |
| P83881 | 60S ribosomal protein L36a                            | RPL36A | 12.43  | 44.91 | 7.55  | 1 | 1 | 1 |
| Q8NI27 | THO complex subunit 2                                 | THOC2  | 182.66 | 44.91 | 1.07  | 2 | 2 | 2 |
| P07814 | Bifunctional glutamate/proline--tRNA ligase           | EPRS1  | 170.48 | 44.88 | 1.52  | 2 | 2 | 2 |
| O14980 | Exportin-1                                            | XPO1   | 123.31 | 44.42 | 3.45  | 3 | 3 | 3 |
| Q7KZI7 | Serine/threonine-protein kinase MARK2                 | MARK2  | 87.86  | 44.39 | 2.54  | 1 | 1 | 1 |
| P81605 | Dermcidin                                             | DCD    | 11.28  | 43.96 | 20.00 | 2 | 2 | 2 |
| P62899 | 60S ribosomal protein L31                             | RPL31  | 14.45  | 43.86 | 17.60 | 2 | 2 | 2 |
| Q14241 | Elongin-A                                             | ELOA   | 89.85  | 43.82 | 2.01  | 1 | 1 | 1 |
| P18887 | DNA repair protein XRCC1                              | XRCC1  | 69.43  | 43.78 | 1.58  | 1 | 1 | 1 |
| P41252 | Isoleucine--tRNA ligase, cytoplasmic                  | IARS1  | 144.41 | 43.61 | 1.66  | 2 | 2 | 2 |
| Q9Y2Z2 | Protein MTO1 homolog, mitochondrial                   | MTO1   | 79.91  | 43.49 | 1.95  | 1 | 1 | 1 |
| O95831 | Apoptosis-inducing factor 1, mitochondrial            | AIFM1  | 66.86  | 43.36 | 2.45  | 1 | 1 | 1 |
| Q9UBL6 | Copine-7                                              | CPNE7  | 70.25  | 43.28 | 1.42  | 1 | 1 | 1 |
| O00264 | Membrane-associated progesterone receptor component 1 | PGRMC1 | 21.66  | 43.26 | 4.10  | 1 | 1 | 1 |
| O43592 | Exportin-T                                            | XPOT   | 109.89 | 43.04 | 2.49  | 2 | 2 | 2 |
| Q12996 | Cleavage stimulation factor subunit 3                 | CSTF3  | 82.87  | 42.68 | 2.65  | 1 | 1 | 1 |
| Q9BZF1 | Oxysterol-binding protein-related protein 8           | OSBPL8 | 101.13 | 42.51 | 1.24  | 1 | 1 | 1 |
| Q9BXS6 | Nucleolar and spindle-associated protein 1            | NUSAP1 | 49.42  | 42.45 | 2.72  | 1 | 1 | 1 |
| Q9BWJ5 | Splicing factor 3B subunit 5                          | SF3B5  | 10.13  | 42.41 | 12.79 | 1 | 1 | 1 |
| Q3KQU3 | MAP7 domain-containing protein 1                      | MAP7D1 | 92.76  | 42.23 | 1.90  | 1 | 1 | 1 |
| Q14978 | Nucleolar and coiled-body phosphoprotein 1            | NOLC1  | 73.56  | 42.02 | 3.29  | 2 | 2 | 2 |

|        |                                                        |          |        |       |       |   |   |   |
|--------|--------------------------------------------------------|----------|--------|-------|-------|---|---|---|
| P49207 | 60S ribosomal protein L34                              | RPL34    | 13.28  | 41.99 | 15.38 | 2 | 2 | 2 |
| Q04637 | Eukaryotic translation initiation factor 4 gamma 1     | EIF4G1   | 175.38 | 41.93 | 0.69  | 1 | 1 | 1 |
| Q8NI36 | WD repeat-containing protein 36                        | WDR36    | 105.26 | 41.92 | 3.68  | 3 | 3 | 3 |
| Q15154 | Pericentriolar material 1 protein                      | PCM1     | 228.40 | 41.85 | 0.54  | 1 | 1 | 1 |
| P62891 | 60S ribosomal protein L39                              | RPL39    | 6.40   | 41.68 | 19.61 | 2 | 2 | 2 |
| P18077 | 60S ribosomal protein L35a                             | RPL35A   | 12.53  | 41.65 | 25.45 | 3 | 3 | 3 |
| Q06265 | Exosome complex component RRP45                        | EXOSC9   | 48.92  | 41.46 | 2.28  | 1 | 1 | 1 |
| Q9UM00 | Calcium load-activated calcium channel                 | TMCO1    | 27.06  | 41.35 | 6.28  | 1 | 1 | 1 |
| O60783 | 28S ribosomal protein S14, mitochondrial               | MRPS14   | 15.13  | 41.15 | 10.16 | 1 | 1 | 1 |
| Q13523 | Serine/threonine-protein kinase PRP4 homolog           | PRPF4B   | 116.92 | 40.63 | 1.19  | 1 | 1 | 1 |
| Q8TDD1 | ATP-dependent RNA helicase DDX54                       | DDX54    | 98.53  | 40.44 | 3.75  | 3 | 3 | 3 |
| Q7Z478 | ATP-dependent RNA helicase DHX29                       | DHX29    | 155.14 | 40.33 | 0.66  | 1 | 1 | 1 |
| Q6PEV8 | Protein FAM199X                                        | FAM199X  | 42.78  | 40.32 | 3.87  | 1 | 1 | 1 |
| P55265 | Double-stranded RNA-specific adenosine deaminase       | ADAR     | 135.98 | 40.30 | 1.96  | 2 | 2 | 2 |
| P0C0S5 | Histone H2A.Z                                          | H2AZ1    | 13.55  | 40.23 | 14.84 | 1 | 2 | 3 |
| Q9UNZ5 | Leydig cell tumor 10 kDa protein homolog               | C19orf53 | 10.57  | 40.03 | 9.09  | 1 | 1 | 1 |
| Q12965 | Unconventional myosin-Ie                               | MYO1E    | 126.98 | 39.85 | 1.62  | 2 | 2 | 2 |
| Q7Z417 | clear fragile X mental retardation-interacting protein | NUFIP2   | 76.08  | 39.79 | 4.75  | 2 | 2 | 2 |
| Q9Y5B6 | PAX3- and PAX7-binding protein 1                       | PAXBP1   | 104.74 | 39.78 | 1.31  | 1 | 1 | 1 |
| P38432 | Coilin                                                 | COIL     | 62.57  | 39.72 | 2.95  | 1 | 1 | 1 |
| Q5C9Z4 | Nucleolar MIF4G domain-containing protein 1            | NOM1     | 96.20  | 39.50 | 1.40  | 1 | 1 | 1 |
| Q6UN15 | Pre-mRNA 3'-end-processing factor FIP1                 | FIP1L1   | 66.49  | 39.14 | 3.20  | 1 | 1 | 1 |
| Q13501 | Sequestosome-1                                         | SQSTM1   | 47.66  | 39.13 | 3.18  | 1 | 1 | 1 |
| Q8N612 | FTS and Hook-interacting protein                       | FAM160A2 | 105.50 | 39.08 | 0.62  | 1 | 1 | 1 |
| O95816 | BAG family molecular chaperone regulator 2             | BAG2     | 23.76  | 38.92 | 4.27  | 1 | 1 | 1 |
| Q92747 | Actin-related protein 2/3 complex subunit 1A           | ARPC1A   | 41.54  | 38.87 | 5.95  | 2 | 2 | 2 |
| Q15758 | Neutral amino acid transporter B(0)                    | SLC1A5   | 56.56  | 38.73 | 3.70  | 1 | 1 | 1 |

|        |                                                      |          |        |       |       |   |   |   |
|--------|------------------------------------------------------|----------|--------|-------|-------|---|---|---|
| Q9UMY1 | Nucleolar protein 7                                  | NOL7     | 29.41  | 38.73 | 3.89  | 1 | 1 | 1 |
| Q12894 | Interferon-related developmental regulator 2         | IFRD2    | 54.78  | 38.19 | 1.78  | 1 | 1 | 1 |
| P00403 | Cytochrome c oxidase subunit 2                       | MT-CO2   | 25.55  | 38.00 | 13.22 | 2 | 2 | 2 |
| Q9BV38 | WD repeat-containing protein 18                      | WDR18    | 47.38  | 37.84 | 4.17  | 2 | 2 | 2 |
| Q14692 | Ribosome biogenesis protein BMS1 homolog             | BMS1     | 145.72 | 37.76 | 1.25  | 1 | 1 | 1 |
| Q8N5H7 | SH2 domain-containing protein 3C                     | SH2D3C   | 94.35  | 37.68 | 0.70  | 1 | 1 | 1 |
| Q9NRL2 | omodomain adjacent to zinc finger domain protein     | BAZ1A    | 178.59 | 37.66 | 0.71  | 1 | 1 | 1 |
| Q9HI18 | Activating signal cointegrator 1 complex subunit 2   | ASCC2    | 86.31  | 37.54 | 1.72  | 1 | 1 | 1 |
| Q86XZ4 | Spermatogenesis-associated serine-rich protein 2     | SPATS2   | 59.51  | 37.19 | 2.75  | 1 | 1 | 1 |
| P57678 | Gem-associated protein 4                             | GEMIN4   | 119.96 | 37.07 | 1.42  | 1 | 1 | 1 |
| O75964 | ATP synthase subunit g, mitochondrial                | ATP5MG   | 11.42  | 36.75 | 23.30 | 2 | 2 | 2 |
| Q12789 | General transcription factor 3C polypeptide 1        | GTF3C1   | 238.73 | 36.68 | 0.76  | 1 | 1 | 1 |
| P55884 | Eukaryotic translation initiation factor 3 subunit B | EIF3B    | 92.42  | 36.63 | 1.72  | 1 | 1 | 1 |
| Q8WTT2 | Nucleolar complex protein 3 homolog                  | NOC3L    | 92.49  | 36.51 | 1.63  | 1 | 1 | 1 |
| Q9BSJ2 | Gamma-tubulin complex component 2                    | TUBGCP2  | 102.47 | 36.46 | 1.22  | 1 | 1 | 1 |
| Q9P031 | Thyroid transcription factor 1-associated protein 2c | CCDC59   | 28.65  | 36.35 | 4.15  | 1 | 1 | 1 |
| Q16718 | dehydrogenase [ubiquinone] 1 alpha subcomplex st     | NDUFA5   | 13.45  | 36.26 | 8.62  | 1 | 1 | 1 |
| P54136 | Arginine--tRNA ligase, cytoplasmic                   | RARS1    | 75.33  | 36.02 | 1.52  | 1 | 1 | 1 |
| Q9BUJ2 | terogeneous nuclear ribonucleoprotein U-like protei  | HNRNPUL1 | 95.68  | 35.95 | 0.82  | 1 | 1 | 1 |
| O00767 | Acyl-CoA desaturase                                  | SCD      | 41.50  | 35.80 | 3.34  | 1 | 1 | 2 |
| P46013 | Proliferation marker protein Ki-67                   | MKI67    | 358.47 | 35.71 | 0.61  | 1 | 1 | 1 |
| Q5BJF2 | Sigma intracellular receptor 2                       | TMEM97   | 20.83  | 35.63 | 4.55  | 1 | 1 | 1 |
| O15235 | 28S ribosomal protein S12, mitochondrial             | MRPS12   | 15.16  | 35.59 | 7.97  | 1 | 1 | 1 |
| P14678 | l nuclear ribonucleoprotein-associated proteins B a  | SNRPB    | 24.59  | 35.47 | 2.92  | 1 | 1 | 1 |
| P68431 | Histone H3.1                                         | H3C1     | 15.39  | 35.42 | 16.91 | 1 | 3 | 3 |
| Q16637 | Survival motor neuron protein                        | SMN1     | 31.83  | 35.11 | 3.40  | 1 | 1 | 1 |
| P45973 | Chromobox protein homolog 5                          | CBX5     | 22.21  | 34.93 | 5.76  | 1 | 1 | 1 |

|        |                                                      |          |        |       |       |   |   |   |
|--------|------------------------------------------------------|----------|--------|-------|-------|---|---|---|
| Q9Y4W2 | Ribosomal biogenesis protein LAS1L                   | LAS1L    | 83.01  | 34.88 | 1.91  | 1 | 1 | 1 |
| O60784 | Target of Myb protein 1                              | TOM1     | 53.79  | 34.86 | 5.28  | 2 | 2 | 2 |
| O15371 | Eukaryotic translation initiation factor 3 subunit D | EIF3D    | 63.93  | 34.65 | 2.55  | 1 | 1 | 1 |
| Q9NWB6 | Arginine and glutamate-rich protein 1                | ARGLU1   | 33.20  | 34.64 | 5.86  | 2 | 2 | 2 |
| Q5XKP0 | MICOS complex subunit MIC13                          | MICOS13  | 13.08  | 34.49 | 5.08  | 1 | 1 | 1 |
| Q15365 | Poly(rC)-binding protein 1                           | PCBP1    | 37.47  | 34.37 | 3.65  | 1 | 1 | 1 |
| O75400 | Pre-mRNA-processing factor 40 homolog A              | PRPF40A  | 108.74 | 34.20 | 1.78  | 1 | 1 | 1 |
| Q13868 | Exosome complex component RRP4                       | EXOSC2   | 32.77  | 34.00 | 5.12  | 1 | 1 | 1 |
| Q96IZ0 | PRKC apoptosis WT1 regulator protein                 | PAWR     | 36.55  | 33.35 | 3.82  | 1 | 1 | 1 |
| Q7Z4Q2 | HEAT repeat-containing protein 3                     | HEATR3   | 74.54  | 33.28 | 2.35  | 1 | 1 | 1 |
| E9PRG8 | Uncharacterized protein C11orf98                     | C11orf98 | 14.23  | 33.24 | 26.02 | 2 | 3 | 3 |
| Q14126 | Desmoglein-2                                         | DSG2     | 122.22 | 33.22 | 1.25  | 1 | 1 | 1 |
| Q9H840 | Gem-associated protein 7                             | GEMIN7   | 14.53  | 33.15 | 9.92  | 1 | 1 | 1 |
| O14979 | Heterogeneous nuclear ribonucleoprotein D-like       | HNRNPDL  | 46.41  | 33.11 | 3.81  | 1 | 1 | 1 |
| Q9BRJ7 | Tudor-interacting repair regulator protein           | NUDT16L1 | 23.32  | 32.88 | 6.64  | 1 | 1 | 1 |
| P02794 | Ferritin heavy chain                                 | FTH1     | 21.21  | 32.78 | 8.20  | 1 | 1 | 1 |
| P61962 | DDB1- and CUL4-associated factor 7                   | DCAF7    | 38.90  | 32.73 | 4.39  | 1 | 1 | 1 |
| Q9Y3D9 | 28S ribosomal protein S23, mitochondrial             | MRPS23   | 21.76  | 32.63 | 5.26  | 1 | 1 | 1 |
| O15020 | Spectrin beta chain, non-erythrocytic 2              | SPTBN2   | 271.16 | 32.58 | 0.25  | 1 | 1 | 1 |
| Q01484 | Ankyrin-2                                            | ANK2     | 433.45 | 32.56 | 0.20  | 1 | 1 | 1 |
| P57088 | Transmembrane protein 33                             | TMEM33   | 27.96  | 32.51 | 3.64  | 1 | 1 | 1 |
| Q92769 | Histone deacetylase 2                                | HDAC2    | 55.33  | 32.39 | 2.46  | 1 | 1 | 1 |
| P12956 | X-ray repair cross-complementing protein 6           | XRCC6    | 69.80  | 32.37 | 3.28  | 1 | 1 | 1 |
| Q9NUL7 | Probable ATP-dependent RNA helicase DDX28            | DDX28    | 59.55  | 32.35 | 2.04  | 1 | 1 | 1 |
| P40937 | Replication factor C subunit 5                       | RFC5     | 38.47  | 32.21 | 2.94  | 1 | 1 | 1 |
| Q6WCQ1 | Myosin phosphatase Rho-interacting protein           | MPRIP    | 116.46 | 32.10 | 2.24  | 2 | 2 | 2 |
| Q9Y3C1 | Nucleolar protein 16                                 | NOP16    | 21.18  | 32.05 | 6.18  | 1 | 1 | 1 |

|        |                                                                    |         |        |       |       |   |   |   |
|--------|--------------------------------------------------------------------|---------|--------|-------|-------|---|---|---|
| Q9UBB4 | Ataxin-10                                                          | ATXN10  | 53.46  | 31.98 | 5.26  | 2 | 2 | 2 |
| Q9H6S0 | 3'-5' RNA helicase YTHDC2                                          | YTHDC2  | 160.15 | 31.89 | 1.40  | 2 | 2 | 2 |
| Q9C0D0 | Phosphatase and actin regulator 1                                  | PHACTR1 | 66.27  | 31.81 | 1.55  | 1 | 1 | 1 |
| P40939 | Trifunctional enzyme subunit alpha, mitochondrial                  | HADHA   | 82.95  | 31.74 | 2.75  | 1 | 1 | 1 |
| O95793 | Double-stranded RNA-binding protein Staufen homolog                | STAU1   | 63.14  | 31.62 | 1.73  | 1 | 1 | 1 |
| Q9Y3D8 | Adenylate kinase isoenzyme 6                                       | AK6     | 20.05  | 31.50 | 5.23  | 1 | 1 | 1 |
| Q5TEC6 | Histone H2B                                                        | H3-2    | 15.42  | 31.43 | 19.85 | 1 | 3 | 3 |
| P82650 | 28S ribosomal protein S22, mitochondrial                           | MRPS22  | 41.25  | 31.38 | 2.22  | 1 | 1 | 1 |
| O60716 | Catenin delta-1                                                    | CTNND1  | 108.10 | 31.18 | 1.34  | 1 | 1 | 1 |
| Q9Y3B4 | Splicing factor 3B subunit 6                                       | SF3B6   | 14.58  | 31.15 | 11.20 | 1 | 1 | 1 |
| Q04837 | Single-stranded DNA-binding protein, mitochondrial                 | SSBP1   | 17.25  | 31.08 | 10.14 | 1 | 1 | 1 |
| O43175 | D-3-phosphoglycerate dehydrogenase                                 | PHGDH   | 56.61  | 31.06 | 1.69  | 1 | 1 | 1 |
| Q9ULH7 | Myocardin-related transcription factor B                           | MRTFB   | 118.05 | 30.66 | 0.55  | 1 | 1 | 1 |
| P40938 | Replication factor C subunit 3                                     | RFC3    | 40.53  | 30.65 | 3.09  | 1 | 1 | 1 |
| Q14315 | Filamin-C                                                          | FLNC    | 290.84 | 30.33 | 0.40  | 1 | 1 | 1 |
| Q9BW72 | HIG1 domain family member 2A, mitochondrial                        | HIGD2A  | 11.52  | 30.28 | 27.36 | 1 | 1 | 1 |
| P52294 | Importin subunit alpha-5                                           | KPNA1   | 60.18  | 30.23 | 3.35  | 1 | 1 | 1 |
| P62714 | Inositol 3-OH kinase protein phosphatase 2A catalytic subunit beta | PPP2CB  | 35.55  | 29.92 | 3.56  | 1 | 1 | 1 |
| P51151 | Ras-related protein Rab-9A                                         | RAB9A   | 22.82  | 29.65 | 6.47  | 1 | 1 | 1 |
| Q15651 | Chromatin assembly factor 1 nucleosome-binding domain-containing   | HMGN3   | 10.66  | 29.61 | 9.09  | 1 | 1 | 1 |
| Q05519 | Serine/arginine-rich splicing factor 11                            | SRSF11  | 53.51  | 29.40 | 4.55  | 2 | 2 | 2 |
| P63220 | 40S ribosomal protein S21                                          | RPS21   | 9.11   | 29.39 | 18.07 | 1 | 1 | 1 |
| P82930 | 28S ribosomal protein S34, mitochondrial                           | MRPS34  | 25.63  | 29.31 | 3.67  | 1 | 1 | 1 |
| Q8WVM0 | Dimethyladenosine transferase 1, mitochondrial                     | TFB1M   | 39.52  | 29.10 | 2.31  | 1 | 1 | 1 |
| Q9UBU9 | Nuclear RNA export factor 1                                        | NXF1    | 70.14  | 28.82 | 1.94  | 1 | 1 | 1 |
| Q14137 | Ribosome biogenesis protein BOP1                                   | BOP1    | 83.58  | 28.65 | 3.35  | 1 | 1 | 1 |
| Q12874 | Splicing factor 3A subunit 3                                       | SF3A3   | 58.81  | 28.65 | 1.80  | 1 | 1 | 1 |



|        |                                                           |         |        |       |       |   |   |   |
|--------|-----------------------------------------------------------|---------|--------|-------|-------|---|---|---|
| Q8WUK0 | tidylglycerophosphatase and protein-tyrosine phosphatase  | PTPMT1  | 22.83  | 28.30 | 5.97  | 1 | 1 | 1 |
| Q5VTL8 | Pre-mRNA-splicing factor 38B                              | PRPF38B | 64.43  | 28.29 | 1.83  | 1 | 1 | 1 |
| P06576 | ATP synthase subunit beta, mitochondrial                  | ATP5F1B | 56.53  | 28.10 | 2.46  | 1 | 1 | 1 |
| Q5SSJ5 | Heterochromatin protein 1-binding protein 3               | HP1BP3  | 61.17  | 27.76 | 1.45  | 1 | 1 | 1 |
| O00743 | serine/threonine-protein phosphatase 6 catalytic subunit  | PPP6C   | 35.12  | 27.69 | 2.95  | 1 | 1 | 1 |
| Q9BT67 | NEDD4 family-interacting protein 1                        | NDFIP1  | 24.88  | 27.38 | 7.69  | 1 | 1 | 1 |
| Q16795 | ubiquinone [ubiquinone] 1 alpha subcomplex subunit 9      | NDUFA9  | 42.48  | 27.37 | 4.51  | 1 | 1 | 1 |
| Q9BZL1 | Ubiquitin-like protein 5                                  | UBL5    | 8.54   | 27.28 | 12.33 | 1 | 1 | 1 |
| P62304 | Small nuclear ribonucleoprotein E                         | SNRPE   | 10.80  | 26.64 | 11.96 | 1 | 1 | 1 |
| Q9NTJ3 | Structural maintenance of chromosomes protein 4           | SMC4    | 147.09 | 26.46 | 0.78  | 1 | 1 | 1 |
| Q9Y3U8 | 60S ribosomal protein L36                                 | RPL36   | 12.25  | 26.41 | 8.57  | 1 | 1 | 1 |
| P14618 | Pyruvate kinase PKM                                       | PKM     | 57.90  | 26.41 | 1.69  | 1 | 1 | 1 |
| Q9UI10 | Translation initiation factor eIF-2B subunit delta        | EIF2B4  | 57.52  | 26.25 | 4.97  | 1 | 1 | 1 |
| Q00577 | Transcriptional activator protein Pur-alpha               | PURA    | 34.89  | 25.81 | 2.80  | 1 | 1 | 1 |
| P15924 | Desmoplakin                                               | DSP     | 331.57 | 25.78 | 0.49  | 1 | 1 | 1 |
| Q9Y678 | Coatomer subunit gamma-1                                  | COPG1   | 97.66  | 25.54 | 1.37  | 1 | 1 | 1 |
| O60231 | Pre-mRNA-splicing factor ATP-dependent RNA helicase 1     | DHX16   | 119.19 | 25.48 | 1.15  | 1 | 1 | 1 |
| Q9NW13 | RNA-binding protein 28                                    | RBM28   | 85.69  | 25.38 | 3.56  | 3 | 3 | 3 |
| P09661 | U2 small nuclear ribonucleoprotein A'                     | SNRPA1  | 28.40  | 25.16 | 3.14  | 1 | 1 | 1 |
| O60942 | mRNA-capping enzyme                                       | RNGTT   | 68.51  | 24.97 | 2.01  | 1 | 1 | 1 |
| Q96EY1 | DNAJ homolog subfamily A member 3, mitochondrial          | DNAJA3  | 52.46  | 24.80 | 2.50  | 1 | 1 | 1 |
| Q13148 | TAR DNA-binding protein 43                                | TARDBP  | 44.71  | 24.72 | 2.90  | 1 | 1 | 1 |
| O76031 | Clp protease ATP-binding subunit clpX-like, non-essential | CLPX    | 69.18  | 24.70 | 1.58  | 1 | 1 | 1 |
| P55769 | NHP2-like protein 1                                       | SNU13   | 14.17  | 24.62 | 14.84 | 2 | 2 | 2 |
| P39748 | Flap endonuclease 1                                       | FEN1    | 42.57  | 24.21 | 2.89  | 1 | 1 | 1 |
| Q9Y6K0 | Choline/ethanolaminephosphotransferase 1                  | CEPT1   | 46.52  | 24.06 | 2.64  | 1 | 1 | 1 |
| Q14232 | Translation initiation factor eIF-2B subunit alpha        | EIF2B1  | 33.69  | 24.04 | 2.30  | 1 | 1 | 1 |

|        |                                                                 |          |        |       |      |   |   |   |
|--------|-----------------------------------------------------------------|----------|--------|-------|------|---|---|---|
| Q15014 | Mortality factor 4-like protein 2                               | MORF4L2  | 32.29  | 24.02 | 3.82 | 1 | 1 | 1 |
| P17302 | Gap junction alpha-1 protein                                    | GJA1     | 42.98  | 23.97 | 2.09 | 1 | 1 | 1 |
| Q8N1F7 | Nuclear pore complex protein Nup93                              | NUP93    | 93.43  | 23.79 | 1.34 | 1 | 1 | 1 |
| P78345 | Ribonuclease P protein subunit p38                              | RPP38    | 31.82  | 23.64 | 4.24 | 1 | 1 | 1 |
| Q8WXX5 | DnaJ homolog subfamily C member 9                               | DNAJC9   | 29.89  | 23.55 | 3.46 | 1 | 1 | 1 |
| P63244 | Receptor of activated protein C kinase 1                        | RACK1    | 35.06  | 23.50 | 6.31 | 2 | 2 | 2 |
| P04181 | Ornithine aminotransferase, mitochondrial                       | OAT      | 48.50  | 23.33 | 2.05 | 1 | 1 | 1 |
| Q9H329 | Band 4.1-like protein 4B                                        | EPB41L4B | 99.65  | 22.76 | 0.89 | 1 | 1 | 1 |
| Q9Y277 | Voltage-dependent anion-selective channel protein 3             | VDAC3    | 30.64  | 22.54 | 4.59 | 1 | 1 | 1 |
| Q9BRP1 | Programmed cell death protein 2-like                            | PDCD2L   | 39.39  | 22.51 | 3.35 | 1 | 1 | 1 |
| Q9BPX5 | Actin-related protein 2/3 complex subunit 5-like protein 1      | ARPC5L   | 16.93  | 22.45 | 3.92 | 1 | 1 | 1 |
| O00487 | 26S proteasome non-ATPase regulatory subunit 14                 | PSMD14   | 34.56  | 22.34 | 2.26 | 1 | 1 | 1 |
| Q96AG4 | Leucine-rich repeat-containing protein 59                       | LRRC59   | 34.91  | 22.06 | 3.91 | 1 | 1 | 1 |
| P78362 | SRSF protein kinase 2                                           | SRPK2    | 77.48  | 22.02 | 1.02 | 1 | 1 | 1 |
| P20700 | Lamin-B1                                                        | LMNB1    | 66.37  | 21.65 | 1.71 | 1 | 1 | 1 |
| Q16531 | DNA damage-binding protein 1                                    | DDB1     | 126.89 | 21.30 | 0.70 | 1 | 1 | 1 |
| O00488 | Zinc finger protein 593                                         | ZNF593   | 15.19  | 21.28 | 6.72 | 1 | 1 | 1 |
| O60678 | Protein arginine N-methyltransferase 3                          | PRMT3    | 59.87  | 20.93 | 2.64 | 1 | 1 | 1 |
| Q969X5 | Endoplasmic reticulum-Golgi intermediate compartment protein 1  | ERGIC1   | 32.57  | 20.42 | 2.76 | 1 | 1 | 1 |
| P06746 | DNA polymerase beta                                             | POLB     | 38.15  | 20.19 | 2.69 | 1 | 1 | 1 |
| Q8IY81 | Large ribosomal subunit 2'-O-ribose RNA methyltransferase FTSJ3 | FTSJ3    | 96.50  | 20.10 | 2.01 | 1 | 1 | 1 |
| Q9UNX4 | WD repeat-containing protein 3                                  | WDR3     | 106.03 | 19.81 | 1.17 | 1 | 1 | 1 |
| P01859 | Immunoglobulin heavy constant gamma 2                           | IGHG2    | 35.88  | 19.51 | 2.76 | 1 | 1 | 1 |
| P60842 | Eukaryotic initiation factor 4A-I                               | EIF4A1   | 46.13  | 0.00  | 5.91 | 2 | 2 | 2 |
| Q96T76 | MMS19 nucleotide excision repair protein homolog                | MMS19    | 113.22 | 0.00  | 2.23 | 1 | 1 | 1 |
| Q96BN2 | Transcriptional adapter 1                                       | TADA1    | 37.36  | 0.00  | 3.28 | 1 | 1 | 1 |
| Q9H845 | Complex I assembly factor ACAD9, mitochondrial                  | ACAD9    | 68.72  | 0.00  | 2.42 | 1 | 1 | 1 |

|        |                                                         |          |        |      |       |   |   |   |
|--------|---------------------------------------------------------|----------|--------|------|-------|---|---|---|
| Q13144 | Translation initiation factor eIF-2B subunit epsilon    | EIF2B5   | 80.33  | 0.00 | 1.66  | 1 | 1 | 1 |
| Q53GQ0 | Very-long-chain 3-oxoacyl-CoA reductase                 | HSD17B12 | 34.30  | 0.00 | 9.29  | 1 | 1 | 1 |
| Q9UBI6 | nucleotide-binding protein G(I)/G(S)/G(O) subunit $\xi$ | GNG12    | 8.00   | 0.00 | 15.28 | 1 | 1 | 1 |
| O15145 | Actin-related protein 2/3 complex subunit 3             | ARPC3    | 20.53  | 0.00 | 6.18  | 1 | 1 | 1 |
| Q8NI77 | Kinesin-like protein KIF18A                             | KIF18A   | 102.22 | 0.00 | 1.78  | 1 | 1 | 1 |
| Q96DI7 | U5 small nuclear ribonucleoprotein 40 kDa protein       | SNRNP40  | 39.29  | 0.00 | 3.08  | 1 | 1 | 1 |
| Q9UBB9 | Tuftelin-interacting protein 11                         | TFIP11   | 96.76  | 0.00 | 1.79  | 1 | 1 | 1 |
| P78316 | Nucleolar protein 14                                    | NOP14    | 97.61  | 0.00 | 1.05  | 1 | 1 | 1 |
| Q15058 | Kinesin-like protein KIF14                              | KIF14    | 186.38 | 0.00 | 0.91  | 1 | 1 | 1 |
| Q92900 | Regulator of nonsense transcripts 1                     | UPF1     | 124.27 | 0.00 | 0.97  | 1 | 1 | 1 |
| O75165 | DnaJ homolog subfamily C member 13                      | DNAJC13  | 254.25 | 0.00 | 0.53  | 1 | 1 | 1 |
| Q7Z4L9 | Protein phosphatase 1 regulatory subunit 42             | PPP1R42  | 35.46  | 0.00 | 2.59  | 1 | 1 | 1 |
| Q8WXA3 | RUN and FYVE domain-containing protein 2                | RUFY2    | 69.97  | 0.00 | 1.32  | 1 | 1 | 1 |
| Q9HAU5 | Regulator of nonsense transcripts 2                     | UPF2     | 147.72 | 0.00 | 0.55  | 1 | 1 | 1 |
| Q7RTR2 | NLR family CARD domain-containing protein 3             | NLRC3    | 114.59 | 0.00 | 0.66  | 1 | 1 | 1 |

---
