# Supplementary material for: VHL suppresses UBE3B-mediated breast tumor growth and metastasis
Source: PubMed Central journal article supplement (PMC11196597; doi:10.1038/s41419-024-06844-x), 2024-06-24

Fig.1 Raw data

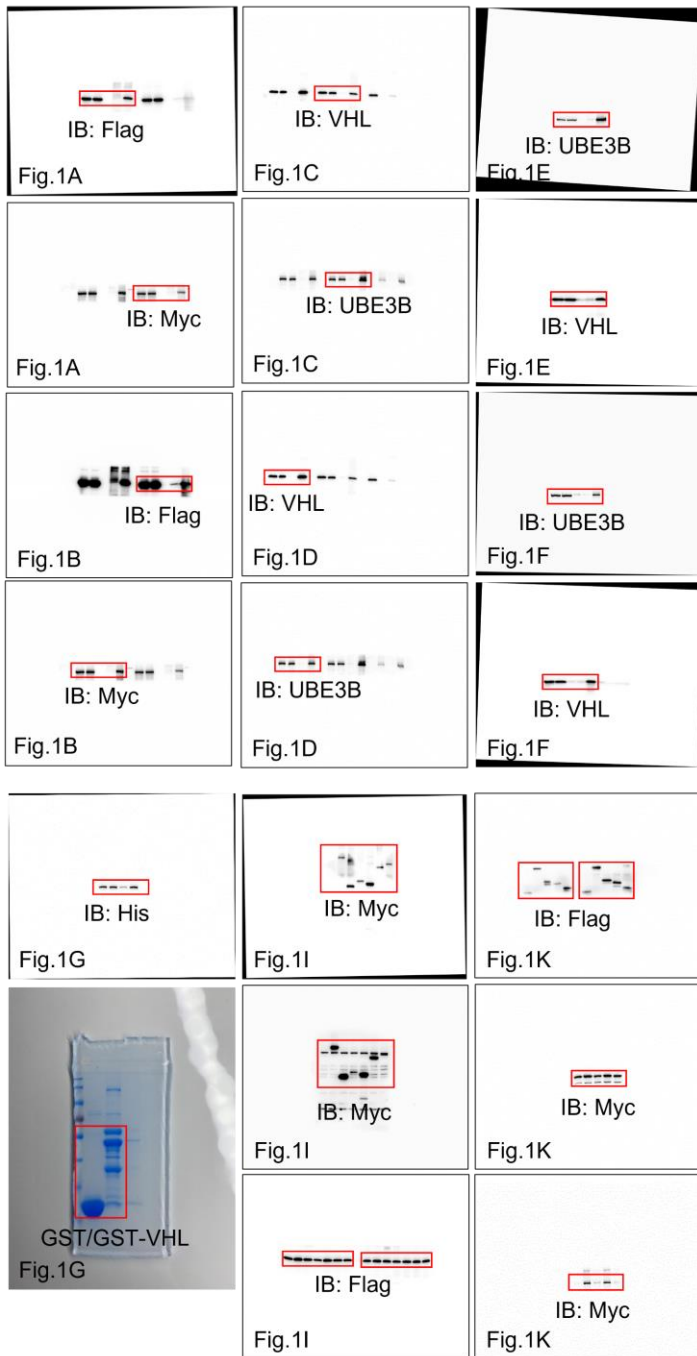

Fig.S1 Raw data

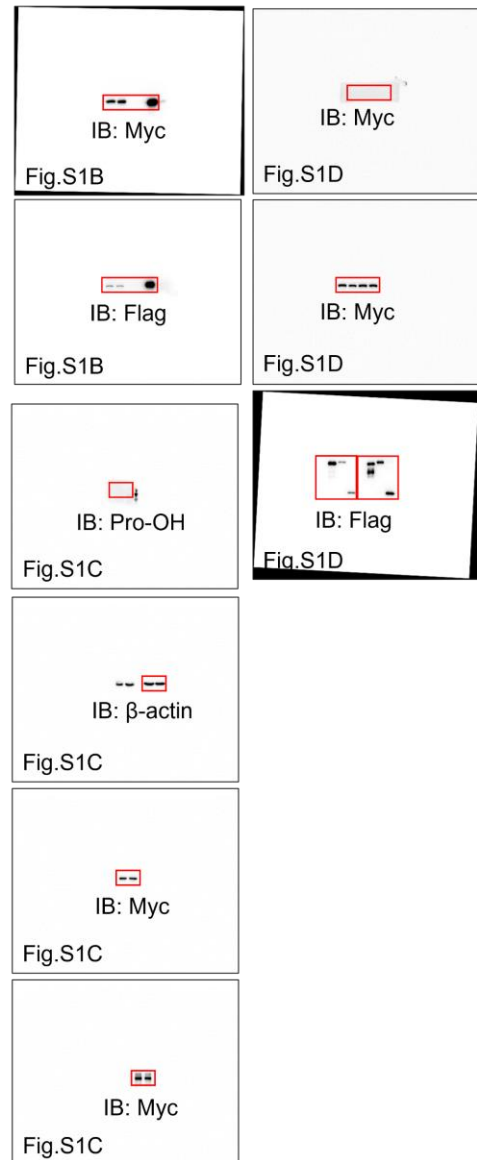

Fig.2 Raw data

Fig.S2 Raw data

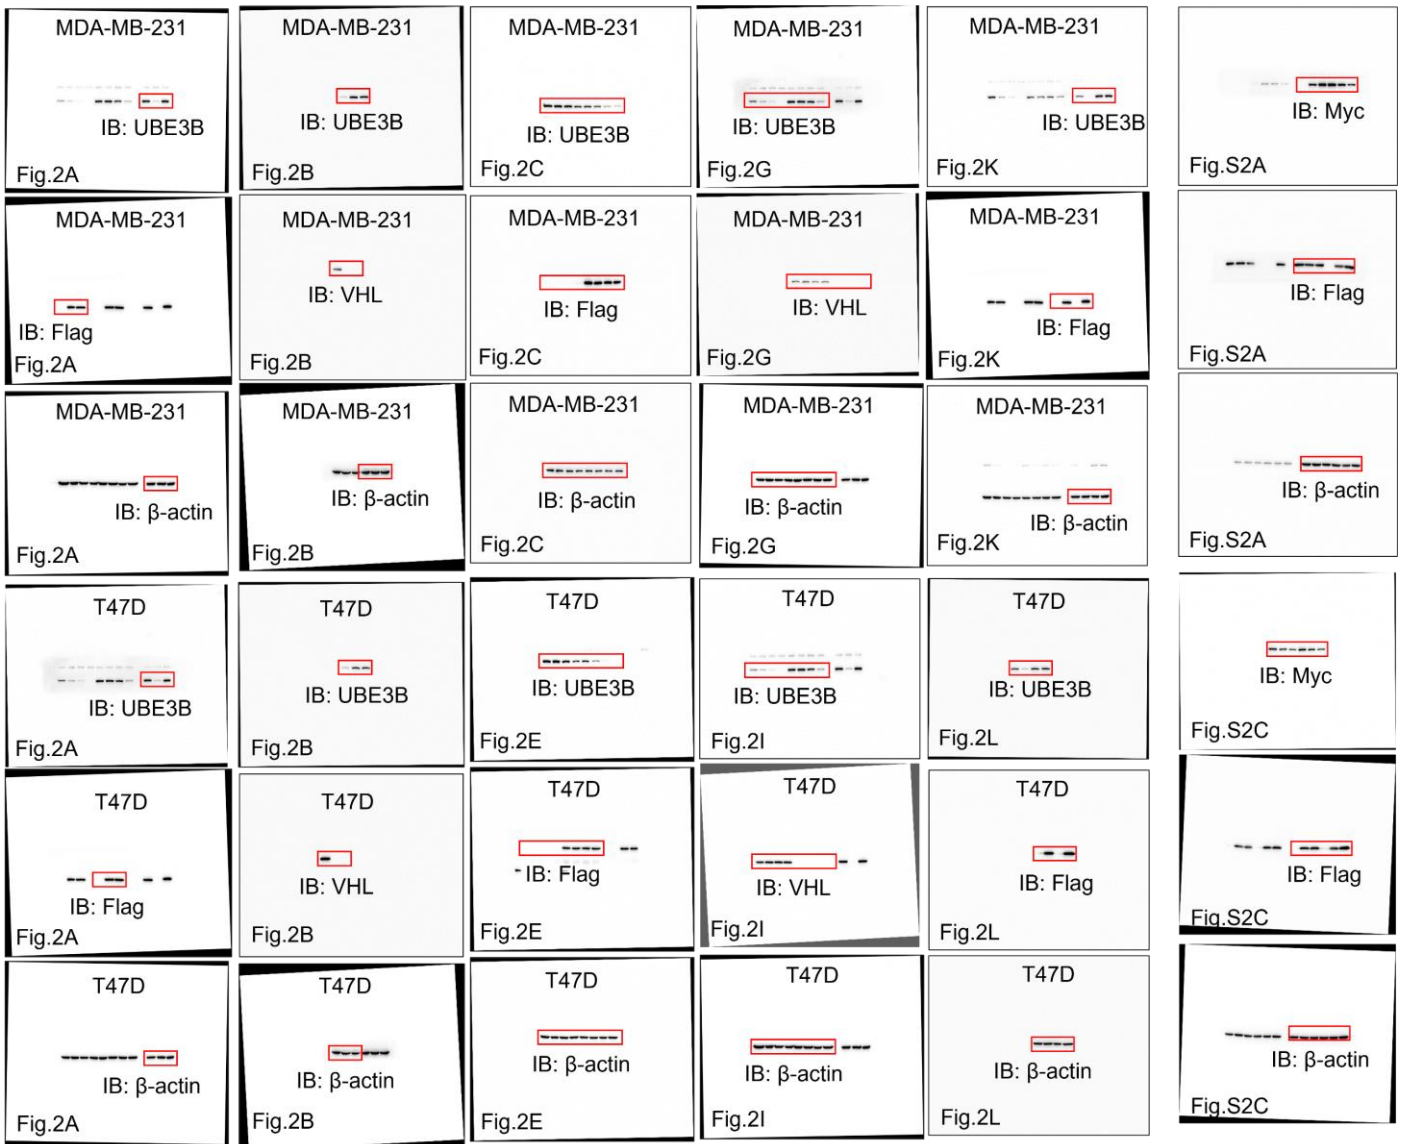

Fig.3 Raw data

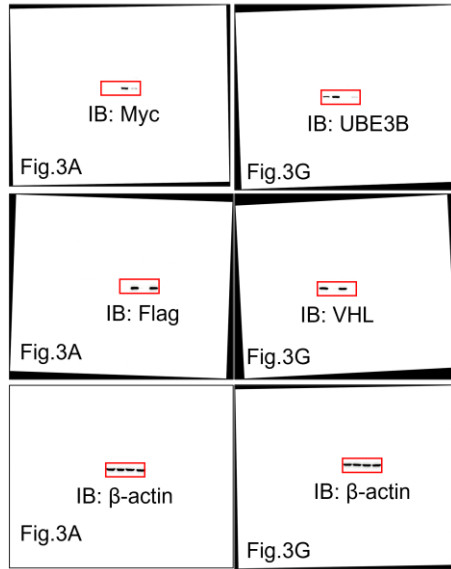

Fig.S3 Raw data

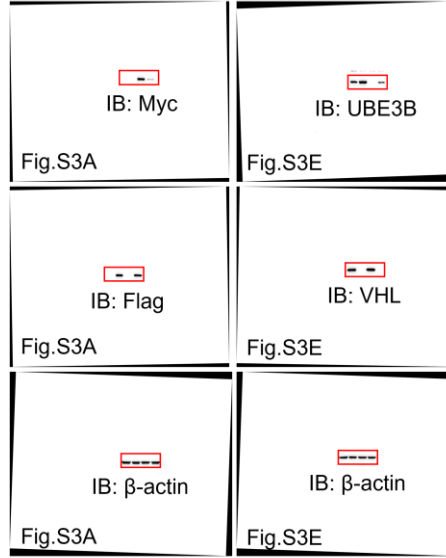

Fig.4 Raw data

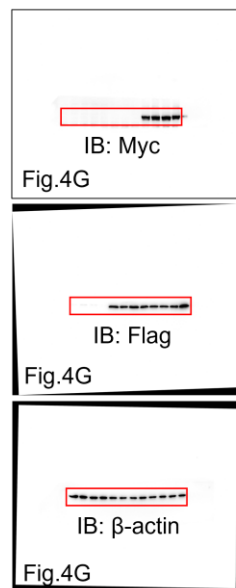

Fig.S4 Raw data

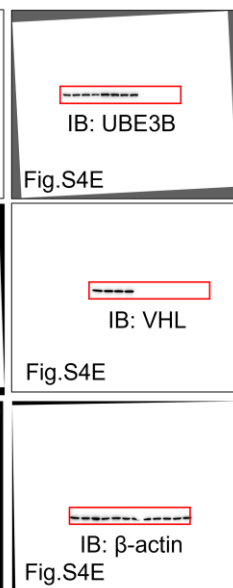

Fig.5 Raw data

Fig.S5 Raw data

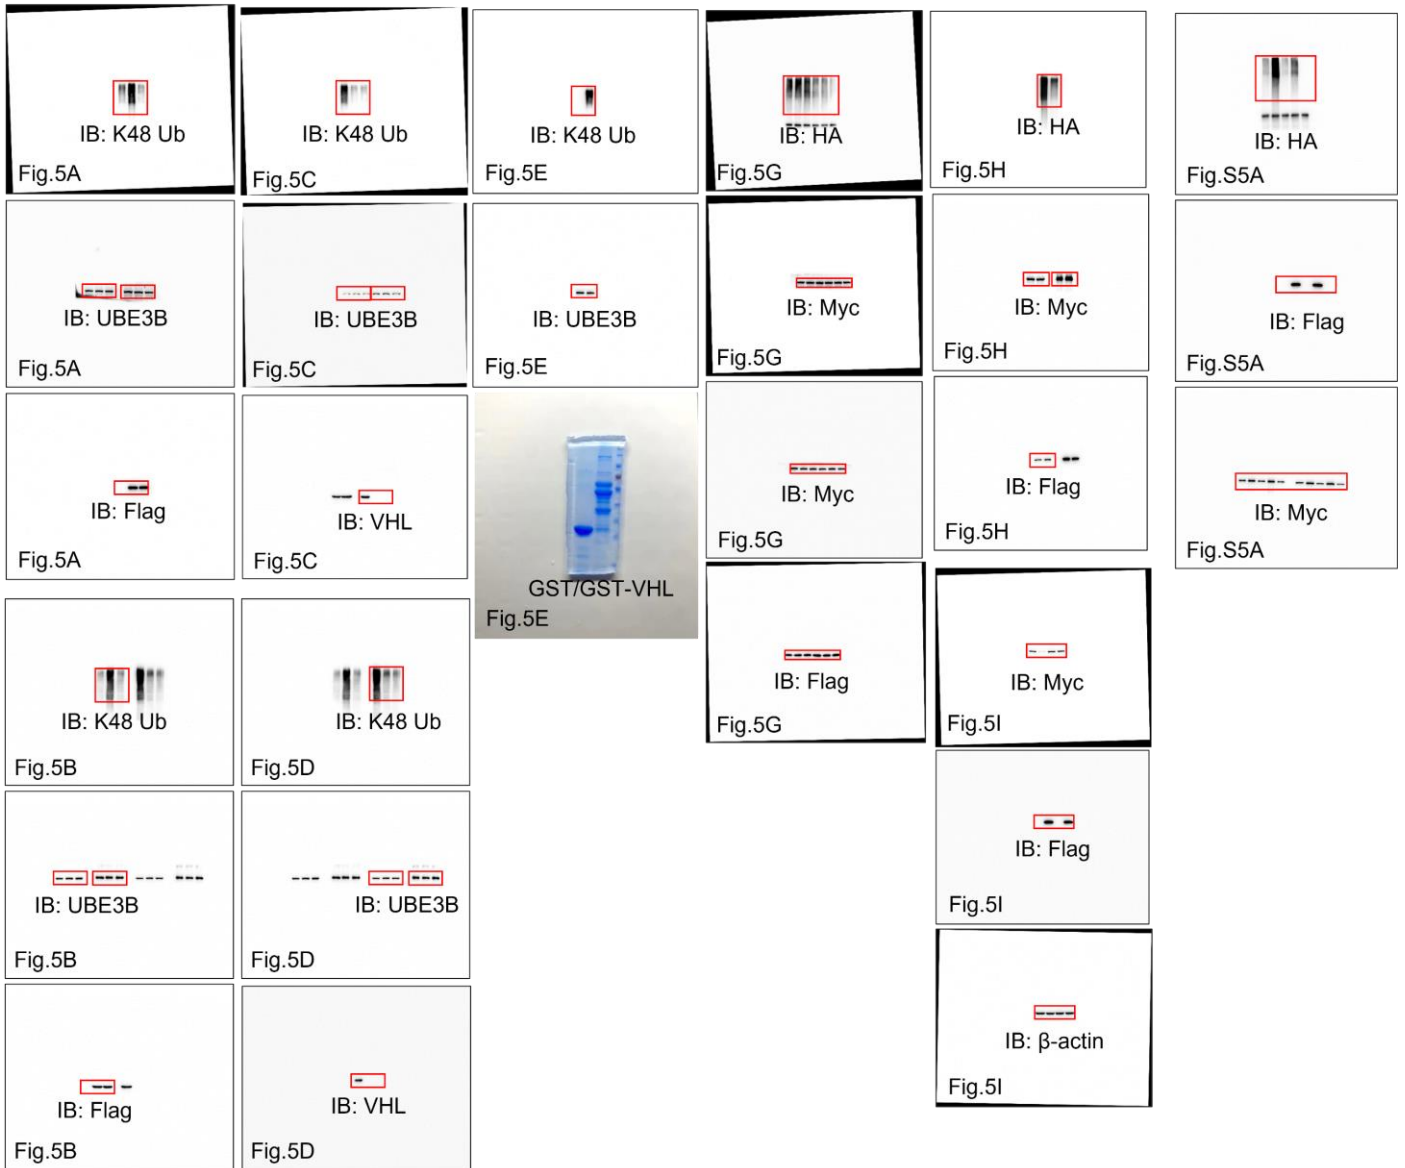

Fig.S6 Raw data

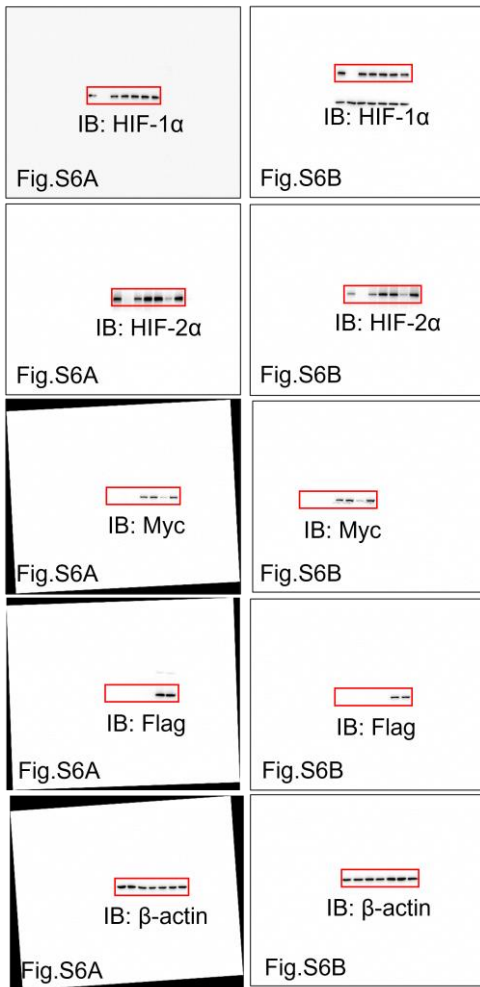

Fig.7 Raw data

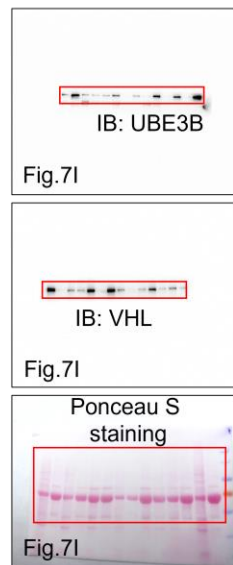

Fig.S7 Raw data

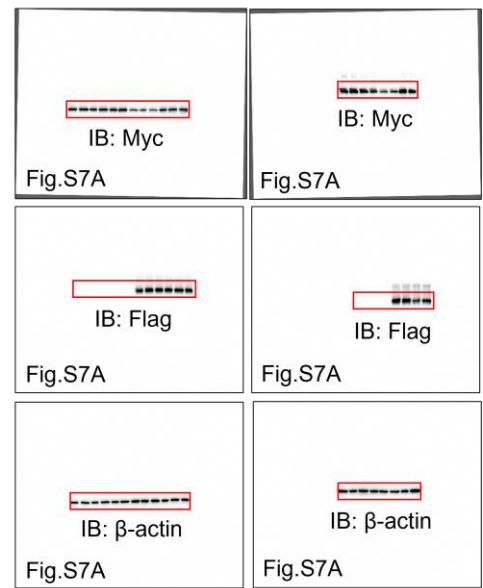

Supplement: 41419_2024_6844_MOESM2_ESM.pdf [file 41419_2024_6844_MOESM2_ESM.pdf]
